# Supplementary material
Source: publisher site journal article supplement (https://www.dovepress.com/article/531730)
Supplement: Supplementary file 1 [file 531730%20Revised%20Supplementary%20Material.docx]

**Supplementary Materials**

**Methods**

***Fecal sample DNA extraction and sequencing methods***

Fecal samples were collected at each participant's home using sterile containers and stored at -80 °C upon receipt until analysis. Total genomic DNA was extracted from stool samples using the iCatcher® Stool DNA 250 Kit (Cat. No. AD22025; CatchGene Co., Ltd.) on the iCatcher® automated purification instrument, according to the manufacturer's protocol. Briefly, up to 100 mg of each stool sample was homogenized in a tube containing beads and 900 µl of Buffer ST1 by vortexing for 1 minute. The resulting lysates were incubated at 95℃ for 15 minutes to facilitate cell lysis. Following incubation, 300 µl of Buffer ST2 was added to each sample, vortexed for 15 seconds, and then incubated on ice for 5 minutes to precipitate inhibitors. Stool debris and precipitates were pelleted by centrifugation at 11,000×g for 2 minutes. For the subsequent automated purification, 250 µl of the cleared supernatant was carefully transferred to a 30 ml Sample Tube, to which 25 µl of Proteinase K (10 mg/ml) was added. The prepared sample tubes were loaded onto the iCatcher® instrument along with the kit's consumables, including the AD22025 Cartridge, Column Set, and Tip Set. The automated purification process was performed using the instrument's "AD22025" protocol. The final purified DNA was eluted in 100 µl of elution buffer. DNA concentration was determined with a Qubit 4.0 Fluorometer (Thermo Fisher Scientific, USA). The extracted DNA was stored at −20℃ for long-term use.

The full-length 16S rRNA gene was amplified via polymerase chain reaction (PCR) with barcoded 16S-specific primers, and sequencing was performed using PacBio's Single Molecule, Real-Time (SMRT) technology (PacBio, Menlo Park, CA, USA). The PCR reaction, employing 2 ng of genomic DNA and KAPA HiFi HotStart ReadyMix (Roche), followed these conditions: 95°C for 3 minutes, 20-30 cycles of 95°C for 30 seconds, 57°C for 30 seconds, and 72°C for 60 seconds, followed by a final extension at 72°C for 5 minutes and storage at 4°C. The PCR products were assessed on a 1% agarose gel, and those with a prominent band at approximately 1,500 bp were purified with AMPure PB Beads and used to prepare the SMRTbell library.

The SMRTbell library underwent DNA damage repair, end-repair/A-tailing, and ligation of universal hairpin adapters. Following this, the library was purified again using AMPure PB beads to remove adapter dimers. The library was then prepared with Sequel II primer 3.1 and Sequel II Binding Kit 3.1 (PacBio) for primer annealing and polymerase attachment. Sequencing was carried out in circular consensus sequence (CCS) mode on the PacBio Sequel IIe platform, generating HiFi reads with a predicted accuracy corresponding to a Phred score of 30 or higher.

***GM analysis and quality control***

CCS reads were processed using PacBio’s SMRT Link software, applying a minimum predicted accuracy of 0.9 and requiring at least three sequencing passes. Only reads with a Q30 quality score or higher, designated as Q30 HiFi reads, were used for analysis. After demultiplexing, HiFi reads were processed with the DADA2 pipeline (version 1.20) to achieve single-nucleotide resolution of amplicon sequence variants (ASVs) (Callahan et al., 2016). Reads were trimmed and filtered with a maximum expected error rate of two per read (maxEE = 2). The DADA2 algorithm was employed to accurately resolve ASVs from the full-length 16S rRNA gene sequence. Taxonomic classification of representative sequences was performed using the feature-classifier (Bokulich et al., 2018) and classify-consensus-vsearch algorithm (Rognes et al., 2016) within QIIME2 (v2022.11), referencing the NCBI 16S ribosomal RNA database (Bolyen et al., 2019). ASV sequence similarity was further analyzed using multiple sequence alignment with the MAFFT tool in QIIME2 (Katoh and Standley, 2013), compared against the NCBI 16S ribosomal RNA database (Balvociute and Huson, 2017; Gyarmati et al., 2016).

**References**

Balvociute M, Huson DH. SILVA, RDP, Greengenes, NCBI and OTT - how do these taxonomies compare? BMC Genomics 2017;18(Suppl 2):114.

Bokulich NA, Kaehler BD, Rideout JR, Dillon M, Bolyen E, Knight R, et al. Optimizing taxonomic classification of marker-gene amplicon sequences with QIIME 2's q2-feature-classifier plugin. Microbiome 2018;6(1):90.

Bolyen E, Rideout JR, Dillon MR, Bokulich NA, Abnet CC, Al-Ghalith GA, et al. Reproducible, interactive, scalable and extensible microbiome data science using QIIME 2. Nat Biotechnol 2019;37(8):852-7.

Callahan BJ, McMurdie PJ, Rosen MJ, Han AW, Johnson AJ, Holmes SP. DADA2: High-resolution sample inference from Illumina amplicon data. Nat Methods 2016;13(7):581-3.

Gyarmati P, Kjellander C, Aust C, Song Y, Ohrmalm L, Giske CG. Metagenomic analysis of bloodstream infections in patients with acute leukemia and therapy-induced neutropenia. Sci Rep 2016;6(23532.

Katoh K, Standley DM. MAFFT multiple sequence alignment software version 7: improvements in performance and usability. Mol Biol Evol 2013;30(4):772-80.

Rognes T, Flouri T, Nichols B, Quince C, Mahe F. VSEARCH: a versatile open source tool for metagenomics. PeerJ 2016;4(e2584.

**Results**

**Supplementary Table 1**. Comparison of gut microbiota relative abundance at the phylum level between subjects with good and poor sleepers.

| Phylum | Test-Statistic | P |
| --- | --- | --- |
| Bacteroidota | 9075 | 0.809 |
| Euryarchaeota | 9288 | 0.431 |
| Cyanobacteria | 9172 | 0.649 |
| Candidatus Melainabacteria | 8970 | 0.165 |
| Proteobacteria | 9208 | 0.969 |
| Deinococcus-Thermus | 9301.5 | 0.739 |
| Actinobacteria | 10258.5 | 0.119 |
| Planctomycetota | 9148.5 | 0.211 |
| Lentisphaerae | 9297 | 0.878 |
| Verrucomicrobia | 9013 | 0.686 |
| Synergistetes | 9519.5 | 0.439 |
| Fusobacteria | 9008 | 0.672 |
| Tenericutes | 9127 | 0.819 |
| Firmicutes | 8862 | 0.571 |

**Supplementary Table 2**. Comparison of gut microbiota relative abundance at the class level between subjects with good and poor sleepers.

| Class | Test-Statistic | P |
| --- | --- | --- |
| Epsilonproteobacteria | 9025.5 | 0.301 |
| Flavobacteriia | 9363 | 0.681 |
| Bacteroidia | 9079 | 0.814 |
| Chitinophagia | 9288 | 0.431 |
| Cytophagia | 9202 | 0.743 |
| Methanobacteria | 9288 | 0.431 |
| Cyanobacteria | 9172 | 0.649 |
| Candidatus Melainabacteria | 8970 | 0.165 |
| Hydrogenophilalia | 9342 | 0.262 |
| Betaproteobacteria | 8393.5 | 0.201 |
| Gammaproteobacteria | 9439 | 0.755 |
| Alphaproteobacteria | 9475.5 | 0.624 |
| Deinococci | 9301.5 | 0.739 |
| Deltaproteobacteria | 9074.5 | 0.806 |
| Coriobacteriia | 9590 | 0.586 |
| Actinomycetia | 9962 | 0.266 |
| Planctomycetia | 9148.5 | 0.211 |
| Lentisphaeria | 9297 | 0.878 |
| Verrucomicrobiae | 9069 | 0.759 |
| Opitutae | 9081 | 0.471 |
| Synergistia | 9519.5 | 0.439 |
| Fusobacteriia | 9008 | 0.672 |
| Mollicutes | 9127 | 0.819 |
| **Erysipelotrichia** | **7872** | **0.038** |
| Bacilli | 9061.5 | 0.793 |
| Negativicutes | 9289 | 0.934 |
| Firmicutes | 8947 | 0.635 |
| Tissierellia | 9244 | 0.971 |
| Clostridia | 8928 | 0.642 |

Note: Bold values indicate gut microbiota taxa with significant differences in relative abundance between good and poor sleepers (as shown in Figure 2).

**Supplementary Table 3**. Comparison of gut microbiota relative abundance at the order level between subjects with good and poor sleepers.

| Order | Test-Statistic | P |
| --- | --- | --- |
| Campylobacterales | 9025.5 | 0.301 |
| Flavobacteriales | 9363 | 0.681 |
| Bacteroidales | 9079 | 0.814 |
| Chitinophagales | 9288 | 0.431 |
| Cytophagales | 9202 | 0.743 |
| Methanobacteriales | 9288 | 0.431 |
| Pseudanabaenales | 9148.5 | 0.211 |
| Chroococcidiopsidales | 9256.5 | 0.851 |
| Vampirovibrionales | 8970 | 0.165 |
| Xanthomonadales | 9084.5 | 0.323 |
| Gammaproteobacteria | 9396 | 0.168 |
| Legionellales | 9288 | 0.431 |
| Hydrogenophilales | 9342 | 0.262 |
| Neisseriales | 9137 | 0.559 |
| Burkholderiales | 8416.5 | 0.213 |
| Nitrosomonadales | 9288 | 0.431 |
| **Moraxellales** | **8630** | **0.009** |
| Pseudomonadales | 8808 | 0.288 |
| Aeromonadales | 9477 | 0.526 |
| Pasteurellales | 9885 | 0.212 |
| Alteromonadales | 9257.5 | 0.845 |
| Enterobacterales | 9309.5 | 0.909 |
| Hyphomicrobiales | 9490.5 | 0.535 |
| Caulobacterales | 9504 | 0.074 |
| Rhodobacterales | 9450 | 0.111 |
| Sphingomonadales | 9239 | 0.989 |
| Rickettsiales | 9148.5 | 0.211 |
| Rhodospirillales | 9421 | 0.559 |
| Deinococcales | 9301.5 | 0.739 |
| Desulfovibrionales | 9074.5 | 0.806 |
| Coriobacteriales | 9658 | 0.511 |
| Eggerthellales | 9299 | 0.914 |
| Corynebacteriales | 9614 | 0.450 |
| Micromonosporales | 9288 | 0.431 |
| Propionibacteriales | 9477 | 0.456 |
| Actinomycetales | 9213 | 0.936 |
| Bifidobacteriales | 9667.5 | 0.501 |
| Micrococcales | 9699 | 0.269 |
| Gemmatales | 9148.5 | 0.211 |
| Victivallales | 9297 | 0.878 |
| Verrucomicrobiales | 9069 | 0.759 |
| Puniceicoccales | 9081 | 0.471 |
| Synergistales | 9519.5 | 0.439 |
| Fusobacteriales | 9008 | 0.672 |
| Acholeplasmatales | 9369 | 0.667 |
| Entomoplasmatales | 9174 | 0.888 |
| Haloplasmatales | 9309 | 0.582 |
| **Erysipelotrichales** | **7872** | **0.038** |
| Bacillales | 9389 | 0.743 |
| Lactobacillales | 8816 | 0.525 |
| Anaeroplasmatales | 9117 | 0.320 |
| Acidaminococcales | 8970.5 | 0.688 |
| Veillonellales | 9184 | 0.939 |
| Selenomonadales | 9556 | 0.575 |
| Firmicutes | 8947 | 0.635 |
| Tissierellales | 9422 | 0.450 |
| Tissierellia | 8977.5 | 0.029 |
| Eubacteriales | 8928 | 0.642 |

Note: Bold values indicate gut microbiota taxa with significant differences in relative abundance between good and poor sleepers (as shown in Figure 2).

**Supplementary Table 4**. Comparison of gut microbiota relative abundance at the family level between subjects with good and poor sleepers.

| Family | Test-Statistic | P |
| --- | --- | --- |
| Campylobacteraceae | 9025.5 | 0.301 |
| Crocinitomicaceae | 9292 | 0.817 |
| Flavobacteriaceae | 9419 | 0.263 |
| Weeksellaceae | 9118 | 0.325 |
| Rikenellaceae | 8382 | 0.194 |
| Tenuifilaceae | 9116 | 0.316 |
| Odoribacteraceae | 8920 | 0.628 |
| Bacteroidaceae | 9009 | 0.732 |
| Prevotellaceae | 9573 | 0.600 |
| Tannerellaceae | 8600 | 0.334 |
| Muribaculaceae | 8612 | 0.211 |
| Barnesiellaceae | 9158 | 0.898 |
| Porphyromonadaceae | 9177 | 0.876 |
| Chitinophagaceae | 9288 | 0.431 |
| Hymenobacteraceae | 9202 | 0.743 |
| Methanobacteriaceae | 9288 | 0.431 |
| Pseudanabaenaceae | 9148.5 | 0.211 |
| Sinocapsaceae | 9256.5 | 0.851 |
| Vampirovibrionales | 8970 | 0.165 |
| Xanthomonadaceae | 9084.5 | 0.323 |
| Gammaproteobacteria | 9396 | 0.168 |
| Coxiellaceae | 9288 | 0.431 |
| Hydrogenophilaceae | 9342 | 0.262 |
| Neisseriaceae | 9137 | 0.559 |
| Alcaligenaceae | 9148.5 | 0.211 |
| Sutterellaceae | 8744 | 0.455 |
| Sterolibacteriaceae | 9288 | 0.431 |
| Oxalobacteraceae | 9925 | 0.116 |
| Burkholderiaceae | 8977.5 | 0.029 |
| Sphaerotilaceae | 9063 | 0.075 |
| Comamonadaceae | 9123.5 | 0.714 |
| **Moraxellaceae** | **8630** | **0.009** |
| Pseudomonadaceae | 8808 | 0.288 |
| Succinivibrionaceae | 9519 | 0.427 |
| Aeromonadaceae | 9222 | 0.939 |
| Pasteurellaceae | 9885 | 0.212 |
| Alteromonadaceae | 9257.5 | 0.845 |
| Yersiniaceae | 9331 | 0.587 |
| Enterobacteriaceae | 9388.5 | 0.814 |
| Erwiniaceae | 9288 | 0.431 |
| Morganellaceae | 9126.5 | 0.629 |
| Acetobacteraceae | 9202 | 0.743 |
| Phreatobacteraceae | 9288 | 0.431 |
| Nitrobacteraceae | 9300 | 0.846 |
| Methylobacteriaceae | 9069 | 0.575 |
| Caulobacteraceae | 9504 | 0.074 |
| Rhodobacteraceae | 9450 | 0.111 |
| Rhizobiaceae | 9203 | 0.751 |
| Phyllobacteriaceae | 9148.5 | 0.211 |
| Sphingomonadaceae | 9239 | 0.989 |
| Erythrobacteraceae | 9288 | 0.431 |
| Anaplasmataceae | 9148.5 | 0.211 |
| Cohaesibacteraceae | 9420 | 0.261 |
| Kiloniellaceae | 9618 | 0.191 |
| Azospirillaceae | 9063 | 0.075 |
| Thalassospiraceae | 9148.5 | 0.211 |
| Deinococcaceae | 9301.5 | 0.739 |
| Desulfovibrionaceae | 9074.5 | 0.806 |
| Coriobacteriaceae | 9505 | 0.674 |
| Atopobiaceae | 9401 | 0.647 |
| Eggerthellaceae | 9299 | 0.914 |
| Lawsonellaceae | 9288 | 0.431 |
| Corynebacteriaceae | 9615 | 0.434 |
| Nocardiaceae | 9222 | 0.939 |
| Micromonosporaceae | 9288 | 0.431 |
| Propionibacteriaceae | 9477 | 0.456 |
| Dermabacteraceae | 9288 | 0.431 |
| Actinomycetaceae | 9213 | 0.936 |
| Bifidobacteriaceae | 9667.5 | 0.501 |
| Microbacteriaceae | 9195.5 | 0.831 |
| Micrococcaceae | 9900 | 0.071 |
| **Dermacoccaceae** | **8977.5** | **0.029** |
| Intrasporangiaceae | 9118 | 0.325 |
| Gemmataceae | 9148.5 | 0.211 |
| Victivallaceae | 9297 | 0.878 |
| Akkermansiaceae | 9069 | 0.759 |
| Puniceicoccaceae | 9081 | 0.471 |
| Synergistaceae | 9519.5 | 0.439 |
| Leptotrichiaceae | 9116 | 0.316 |
| Fusobacteriaceae | 9128.5 | 0.842 |
| Acholeplasmataceae | 9369 | 0.667 |
| Spiroplasmataceae | 9174 | 0.888 |
| Planococcaceae | 9117 | 0.320 |
| Haloplasmataceae | 9309 | 0.582 |
| Bacillaceae | 9328.5 | 0.773 |
| Erysipelotrichaceae | 8974 | 0.692 |
| Coprobacillaceae | 8542 | 0.157 |
| Thermoactinomycetaceae | 9148.5 | 0.211 |
| Paenibacillaceae | 9148.5 | 0.211 |
| Alicyclobacillaceae | 9288 | 0.431 |
| Staphylococcaceae | 9331.5 | 0.705 |
| Aerococcaceae | 9312 | 0.566 |
| Carnobacteriaceae | 9271.5 | 0.939 |
| Streptococcaceae | 9355 | 0.854 |
| Enterococcaceae | 9712 | 0.233 |
| Bacillales | 9167 | 0.828 |
| Turicibacteraceae | 8875 | 0.375 |
| Anaeroplasmataceae | 9117 | 0.320 |
| Peptococcaceae | 9604 | 0.414 |
| Acidaminococcaceae | 8970.5 | 0.688 |
| Veillonellaceae | 9184 | 0.939 |
| Selenomonadaceae | 9556 | 0.575 |
| Feifaniaceae | 9356 | 0.714 |
| Yeguiaceae | 8945 | 0.056 |
| Eubacteriaceae | 9173 | 0.926 |
| Oscillospiraceae | 9023 | 0.748 |
| Eubacteriales | 9267.5 | 0.960 |
| Firmicutes | 8947 | 0.635 |
| Clostridiaceae | 9368 | 0.839 |
| Peptoniphilaceae | 9422 | 0.450 |
| Tissierellia | 8977.5 | 0.029 |
| Christensenellaceae | 9360 | 0.838 |
| Xylanivirgaceae | 8803 | 0.042 |
| Peptostreptococcaceae | 9030 | 0.745 |
| Eubacteriales Family XIII. Incertae Sedis | 9039 | 0.748 |
| Bianqueaceae | 9366 | 0.638 |
| Lactobacillaceae | 8863 | 0.571 |
| Lachnospiraceae | 9450 | 0.743 |

Note: Bold values indicate gut microbiota taxa with significant differences in relative abundance between good and poor sleepers (as shown in Figure 2).

**Supplementary Table 5**. Comparison of gut microbiota relative abundance at the genus level between subjects with good and poor sleepers.

| Genus | Test-Statistic | P |
| --- | --- | --- |
| Campylobacter | 9025.5 | 0.301 |
| Arenibacter | 9257.5 | 0.845 |
| Wandonia | 9292 | 0.817 |
| Capnocytophaga | 9288 | 0.431 |
| Flavobacterium | 9396 | 0.168 |
| Cloacibacterium | 9063 | 0.075 |
| Chryseobacterium | 9288 | 0.431 |
| Epilithonimonas | 9148.5 | 0.211 |
| Rikenella | 9288 | 0.431 |
| Tidjanibacter | 9321 | 0.708 |
| Alistipes | 8347 | 0.176 |
| Perlabentimonas | 9116 | 0.316 |
| Acetobacteroides | 9108 | 0.508 |
| Millionella | 9342 | 0.262 |
| Sanguibacteroides | 9283 | 0.769 |
| Gabonibacter | 9226 | 0.960 |
| Butyricimonas | 9425 | 0.762 |
| Culturomica | 9157 | 0.790 |
| Odoribacter | 8962 | 0.663 |
| Phocaeicola | 9146.5 | 0.895 |
| Caecibacteroides | 8961 | 0.151 |
| Bacteroides | 9150.5 | 0.899 |
| Paraprevotella | 9504 | 0.629 |
| Metaprevotella | 9288 | 0.431 |
| Prevotella | 9486 | 0.689 |
| Massiliprevotella | 9334 | 0.576 |
| Marseilla | 9249 | 0.939 |
| Pseudoprevotella | 8977.5 | 0.029 |
| Prevotellamassilia | 9137 | 0.762 |
| Alloprevotella | 9342 | 0.262 |
| Parabacteroides | 8600 | 0.334 |
| Porphyromonas | 9225 | 0.955 |
| Sodaliphilus | 9257.5 | 0.845 |
| Duncaniella | 8947.5 | 0.488 |
| Muribaculum | 8798 | 0.266 |
| Barnesiella | 9111.5 | 0.828 |
| Gabonia | 8988 | 0.414 |
| Coprobacter | 9152.5 | 0.834 |
| Puia | 9288 | 0.431 |
| Hymenobacter | 9202 | 0.743 |
| Methanobrevibacter | 9288 | 0.431 |
| Amazoninema | 9148.5 | 0.211 |
| Sinocapsa | 9256.5 | 0.851 |
| Vampirovibrio | 8970 | 0.165 |
| Stenotrophomonas | 9171 | 0.644 |
| Pseudoxanthomonas | 9148.5 | 0.211 |
| Acidibacter | 9396 | 0.168 |
| Aquicella | 9288 | 0.431 |
| Tepidiphilus | 9342 | 0.262 |
| Neisseria | 9137 | 0.559 |
| Alcaligenes | 9148.5 | 0.211 |
| Turicimonas | 9014 | 0.377 |
| Parasutterella | 8640 | 0.293 |
| Mesosutterella | 9363 | 0.646 |
| Dakarella | 8615.5 | 0.134 |
| Sutterella | 9996 | 0.221 |
| Duodenibacillus | 9121 | 0.824 |
| Methyloversatilis | 9288 | 0.431 |
| Burkholderia | 9148.5 | 0.211 |
| Ralstonia | 9148.5 | 0.211 |
| Massilia | 9037 | 0.394 |
| Oxalobacter | 10013 | 0.039 |
| Herbaspirillum | 9504 | 0.074 |
| Quisquiliibacterium | 9148.5 | 0.211 |
| Ideonella | 9148.5 | 0.211 |
| Roseateles | 9148.5 | 0.211 |
| Comamonas | 9203 | 0.751 |
| Delftia | 9310 | 0.576 |
| Acidovorax | 9257.5 | 0.845 |
| Diaphorobacter | 9063 | 0.075 |
| Variovorax | 9252 | 0.927 |
| Curvibacter | 9255.5 | 0.858 |
| Moraxella | 8912.5 | 0.071 |
| Acinetobacter | 8948 | 0.058 |
| Pseudomonas | 8808 | 0.288 |
| Succinatimonas | 9515.5 | 0.241 |
| Succinivibrio | 9234 | 1.000 |
| Pseudaeromonas | 9288 | 0.431 |
| Aeromonas | 9169 | 0.633 |
| Haemophilus | 9885 | 0.212 |
| Aggregatibacter | 9450 | 0.111 |
| Plesiomonas | 9032 | 0.136 |
| Alishewanella | 9257.5 | 0.845 |
| Serratia | 9331 | 0.587 |
| Kluyvera | 8942 | 0.168 |
| Lelliottia | 9148.5 | 0.211 |
| Raoultella | 9240 | 0.977 |
| Phytobacter | 9396 | 0.168 |
| Enterobacter | 9608 | 0.474 |
| Leclercia | 9342 | 0.262 |
| Pluralibacter | 9148.5 | 0.211 |
| Pseudenterobacter | 9288 | 0.431 |
| Shigella | 9019 | 0.741 |
| Escherichia | 8653 | 0.212 |
| Shimwellia | 9288 | 0.431 |
| Citrobacter | 9229 | 0.991 |
| Salmonella | 9288 | 0.431 |
| Pseudocitrobacter | 9280 | 0.783 |
| Cronobacter | 9202 | 0.743 |
| Atlantibacter | 9148.5 | 0.211 |
| Klebsiella | 9046 | 0.767 |
| Pantoea | 9288 | 0.431 |
| Morganella | 9278 | 0.792 |
| Providencia | 9030 | 0.132 |
| Proteus | 9203 | 0.751 |
| Caldovatus | 9148.5 | 0.211 |
| Roseomonas | 9288 | 0.431 |
| Phreatobacter | 9288 | 0.431 |
| Bradyrhizobium | 9334.5 | 0.758 |
| Tardiphaga | 9288 | 0.431 |
| Rhodopseudomonas | 9148.5 | 0.211 |
| Methylobacterium | 9069 | 0.575 |
| Methylorubrum | 9148.5 | 0.211 |
| Brevundimonas | 9450 | 0.111 |
| Paracoccus | 9450 | 0.111 |
| Rhizobium | 9148.5 | 0.211 |
| Shinella | 9288 | 0.431 |
| Tianweitania | 9148.5 | 0.211 |
| Sphingomonas | 9240 | 0.987 |
| Qipengyuania | 9288 | 0.431 |
| Novosphingobium | 9249 | 0.939 |
| Oleisolibacter | 9148.5 | 0.211 |
| Anaplasma | 9148.5 | 0.211 |
| Cohaesibacter | 9420 | 0.261 |
| Pseudaquidulcibacter | 9288 | 0.431 |
| Aestuariispira | 9711 | 0.096 |
| Kiloniella | 9148.5 | 0.211 |
| Azospirillum | 9148.5 | 0.211 |
| Magnetospira | 9148.5 | 0.211 |
| Deinococcus | 9301.5 | 0.739 |
| Bilophila | 8675 | 0.383 |
| Mailhella | 9416.5 | 0.411 |
| Desulfovibrio | 9537 | 0.545 |
| Enorma | 8740.5 | 0.014 |
| Collinsella | 9790 | 0.386 |
| Paratractidigestivibacter | 9332 | 0.584 |
| Tractidigestivibacter | 9476 | 0.347 |
| Lancefieldella | 9245 | 0.956 |
| Thermophilibacter | 9148.5 | 0.211 |
| Olsenella | 9203 | 0.751 |
| Eggerthella | 9395.5 | 0.677 |
| Gordonibacter | 9600 | 0.179 |
| Parvibacter | 9504 | 0.074 |
| Raoultibacter | 9131 | 0.818 |
| Paraeggerthella | 9148.5 | 0.211 |
| Adlercreutzia | 9068 | 0.717 |
| Slackia | 9673 | 0.097 |
| Ellagibacter | 9288 | 0.431 |
| Senegalimassilia | 9260 | 0.923 |
| Lawsonella | 9288 | 0.431 |
| Corynebacterium | 9615 | 0.434 |
| Williamsia | 9148.5 | 0.211 |
| Rhodococcus | 9342 | 0.262 |
| Nocardia | 9202 | 0.743 |
| Micromonospora | 9288 | 0.431 |
| Propionibacterium | 9288 | 0.431 |
| Cutibacterium | 9427 | 0.547 |
| Brachybacterium | 9288 | 0.431 |
| Peptidiphaga | 9148.5 | 0.211 |
| Schaalia | 9163 | 0.726 |
| Actinomyces | 9281 | 0.778 |
| Alloscardovia | 9288 | 0.431 |
| Gardnerella | 9288 | 0.431 |
| Bifidobacterium | 9666.5 | 0.502 |
| Microbacterium | 9195.5 | 0.831 |
| Kocuria | 9203 | 0.751 |
| Rothia | 9939.5 | 0.049 |
| **Dermacoccus** | **8977.5** | **0.029** |
| Lapillicoccus | 9118 | 0.325 |
| Gemmata | 9148.5 | 0.211 |
| Victivallis | 9297 | 0.878 |
| Akkermansia | 9069 | 0.759 |
| Ruficoccus | 9148.5 | 0.211 |
| Coraliomargarita | 9081 | 0.471 |
| Cloacibacillus | 9596 | 0.239 |
| Pyramidobacter | 9415 | 0.495 |
| Leptotrichia | 9148.5 | 0.211 |
| Pseudoleptotrichia | 9202 | 0.743 |
| Fusobacterium | 9128.5 | 0.842 |
| Asteroleplasma | 9203 | 0.751 |
| Solobacterium | 9251 | 0.931 |
| Haploplasma | 9369 | 0.667 |
| Spiroplasma | 9174 | 0.888 |
| Rummeliibacillus | 9117 | 0.320 |
| Breznakia | 9057 | 0.573 |
| Ornithinibacillus | 9250 | 0.935 |
| Haloplasma | 9309 | 0.582 |
| Holdemania | 9309 | 0.887 |
| Bacillus | 9281 | 0.778 |
| Rossellomorea | 9249 | 0.939 |
| Stecheria | 9288 | 0.431 |
| Lactimicrobium | 9419 | 0.263 |
| Bulleidia | 9203 | 0.751 |
| Holdemanella | 9441.5 | 0.703 |
| Faecalibaculum | 9148.5 | 0.211 |
| Allobaculum | 9419 | 0.263 |
| Absicoccus | 9255.5 | 0.858 |
| Faecalicoccus | 9148.5 | 0.211 |
| Faecalitalea | 9256.5 | 0.851 |
| Merdibacter | 9288 | 0.431 |
| Massilicoli | 9148.5 | 0.211 |
| Amedibacterium | 9381 | 0.440 |
| Amedibacillus | 8895 | 0.351 |
| Longicatena | 9417 | 0.269 |
| Copranaerobaculum | 9148.5 | 0.211 |
| Dielma | 9276 | 0.890 |
| Beduini | 9255.5 | 0.858 |
| Erysipelatoclostridium | 8385.5 | 0.142 |
| Faecalibacillus | 8857 | 0.553 |
| Massilimicrobiota | 8754 | 0.078 |
| Longibaculum | 9122 | 0.673 |
| Coprobacillus | 9293 | 0.855 |
| Catenibacterium | 8490 | 0.080 |
| Polycladomyces | 9148.5 | 0.211 |
| Aneurinibacillus | 9148.5 | 0.211 |
| Paenibacillus | 9148.5 | 0.211 |
| Tumebacillus | 9288 | 0.431 |
| Geobacillus | 9148.5 | 0.211 |
| Parageobacillus | 9288 | 0.431 |
| Niallia | 9148.5 | 0.211 |
| Robertmurraya | 9288 | 0.431 |
| Mammaliicoccus | 9148.5 | 0.211 |
| Staphylococcus | 9331.5 | 0.705 |
| Carnobacterium | 9288 | 0.431 |
| Globicatella | 9288 | 0.431 |
| Abiotrophia | 9257.5 | 0.845 |
| Granulicatella | 9223 | 0.983 |
| Ligilactobacillus | 9097 | 0.695 |
| Pediococcus | 9288 | 0.431 |
| Lacticaseibacillus | 9281 | 0.778 |
| Latilactobacillus | 9288 | 0.431 |
| Lactiplantibacillus | 9082.5 | 0.317 |
| Companilactobacillus | 9118 | 0.325 |
| Limosilactobacillus | 9091 | 0.649 |
| Leuconostoc | 9651 | 0.136 |
| Weissella | 9350.5 | 0.651 |
| Streptococcus | 9264 | 0.964 |
| Lactococcus | 9900 | 0.023 |
| Enterococcus | 9810.5 | 0.146 |
| Tetragenococcus | 9148.5 | 0.211 |
| Gemella | 9167 | 0.828 |
| Turicibacter | 8875 | 0.375 |
| Anaeroplasma | 9148.5 | 0.211 |
| Peptococcus | 9269.5 | 0.934 |
| Desulfonispora | 9288 | 0.431 |
| Dehalobacterium | 9534 | 0.258 |
| Hydrogenispora | 9342 | 0.262 |
| Acidaminococcus | 8936 | 0.533 |
| Phascolarctobacterium | 9019.5 | 0.742 |
| Veillonella | 9299 | 0.913 |
| Allisonella | 9432.5 | 0.673 |
| Dialister | 9307 | 0.896 |
| Megasphaera | 9571 | 0.457 |
| Caecibacter | 9291 | 0.867 |
| Anaeroglobus | 9203 | 0.751 |
| Massilibacillus | 9148.5 | 0.211 |
| Selenomonas | 9148.5 | 0.211 |
| Mitsuokella | 9512 | 0.402 |
| Megamonas | 9403 | 0.752 |
| Ruminiclostridium | 9148.5 | 0.211 |
| Anaerobacterium | 9921 | 0.203 |
| Acetivibrio | 8988.5 | 0.626 |
| Petroclostridium | 9547 | 0.328 |
| Intestinimonas | 9201.5 | 0.960 |
| Sporobacter | 9396 | 0.168 |
| Vescimonas | 9283 | 0.941 |
| Marseillibacter | 9398 | 0.799 |
| Oscillibacter | 8856.5 | 0.561 |
| Pusillibacter | 9625 | 0.444 |
| Dysosmobacter | 9202 | 0.743 |
| Flavonifractor | 8829 | 0.524 |
| Pseudoflavonifractor | 8510 | 0.068 |
| Lawsonibacter | 8377 | 0.163 |
| Evtepia | 9919.5 | 0.263 |
| Agathobaculum | 8431 | 0.213 |
| Butyricicoccus | 9134 | 0.875 |
| Intestinibacillus | 9148.5 | 0.211 |
| Feifania | 9356 | 0.714 |
| Papillibacter | 9037.5 | 0.547 |
| Colidextribacter | 9483 | 0.397 |
| Tepidibaculum | 9148.5 | 0.211 |
| Pseudoruminococcus | 8880.5 | 0.294 |
| Anaeromassilibacillus | 8961 | 0.476 |
| Ruminococcoides | 9178 | 0.896 |
| [Clostridium] | 8826 | 0.453 |
| Yeguia | 8945 | 0.056 |
| Caproicibacter | 9203 | 0.751 |
| Hydrogeniiclostridium | 9132 | 0.807 |
| Caproiciproducens | 9494 | 0.425 |
| Eubacterium | 9233 | 0.999 |
| Neglectibacter | 8910 | 0.566 |
| Solibaculum | 10279.5 | 0.070 |
| [Eubacterium] | 9375 | 0.774 |
| Ruminococcus | 9647 | 0.527 |
| Massilioclostridium | 9270.5 | 0.918 |
| Paludicola | 9237 | 0.993 |
| Fumia | 9453 | 0.476 |
| Massiliimalia | 8843 | 0.140 |
| Pygmaiobacter | 9288 | 0.431 |
| Fournierella | 8926 | 0.146 |
| Faecalibacterium | 8826 | 0.534 |
| Subdoligranulum | 9190.5 | 0.809 |
| Gemmiger | 9130 | 0.873 |
| Ruthenibacterium | 8786 | 0.450 |
| Gorbachella | 8937 | 0.248 |
| Anaerofilum | 9380 | 0.544 |
| Bittarella | 8725.5 | 0.076 |
| Acetanaerobacterium | 9162 | 0.722 |
| Phocea | 8352 | 0.150 |
| Angelakisella | 9672 | 0.269 |
| Anaerotruncus | 9497 | 0.502 |
| Marasmitruncus | 9063 | 0.075 |
| Negativibacillus | 8911 | 0.593 |
| Provencibacterium | 9143 | 0.716 |
| Monoglobus | 9282 | 0.773 |
| Congzhengia | 9311 | 0.571 |
| **Ructibacterium** | **7586** | **0.011** |
| Clostridium | 8864 | 0.573 |
| Anaerofustis | 9202 | 0.743 |
| Pseudoramibacter | 9148.5 | 0.211 |
| Parvimonas | 9224 | 0.950 |
| Ezakiella | 8977.5 | 0.029 |
| Anaerosphaera | 9277 | 0.797 |
| Urinicoccus | 9288 | 0.431 |
| Peptoniphilus | 9396 | 0.168 |
| Luoshenia | 8954 | 0.587 |
| Guopingia | 9483 | 0.653 |
| Gehongia | 9456.5 | 0.590 |
| Christensenella | 9146.5 | 0.871 |
| Xylanivirga | 8803 | 0.042 |
| Peptostreptococcus | 9288 | 0.431 |
| Clostridioides | 9063 | 0.075 |
| Paraclostridium | 9288 | 0.431 |
| Paeniclostridium | 9148.5 | 0.211 |
| **Intestinibacter** | **8106.5** | **0.028** |
| Romboutsia | 9409.5 | 0.763 |
| Terrisporobacter | 9034 | 0.387 |
| Peptacetobacter | 9337 | 0.564 |
| Lentihominibacter | 9062 | 0.709 |
| Zhenpiania | 8904 | 0.153 |
| Aminipila | 9023 | 0.510 |
| Sinanaerobacter | 9806 | 0.234 |
| Baileyella | 9288 | 0.431 |
| Mobilibacterium | 9288 | 0.431 |
| Mogibacterium | 9148.5 | 0.211 |
| Congobacterium | 9396 | 0.168 |
| Eubacterium | 9256.5 | 0.851 |
| Aminicella | 9148.5 | 0.211 |
| Emergencia | 9165 | 0.783 |
| Ihubacter | 8872 | 0.394 |
| Bacilliculturomica | 9203 | 0.751 |
| Cellulosilyticum | 9148.5 | 0.211 |
| Zhenhengia | 9202 | 0.743 |
| Bianquea | 9366 | 0.638 |
| Tyzzerella | 8947.5 | 0.470 |
| Anaerotignum | 9056 | 0.786 |
| Catenibacillus | 9272 | 0.915 |
| Frisingicoccus | 9420 | 0.561 |
| Anaerosacchariphilus | 8963 | 0.620 |
| Howardella | 9761 | 0.040 |
| Lachnospira | 8934 | 0.647 |
| Lactobacillus | 8884 | 0.592 |
| Butyribacter | 9567 | 0.278 |
| Wujia | 9638.5 | 0.369 |
| Coprococcus | 10207 | 0.137 |
| Lachnoanaerobaculum | 9342 | 0.262 |
| Butyrivibrio | 9203 | 0.751 |
| Oribacterium | 8977.5 | 0.029 |
| Kineothrix | 9288 | 0.431 |
| Eisenbergiella | 9910 | 0.274 |
| Waltera | 9038 | 0.765 |
| Fusimonas | 9155 | 0.752 |
| Konateibacter | 9088 | 0.727 |
| Cuneatibacter | 9447.5 | 0.434 |
| Anaerobutyricum | 9222 | 0.985 |
| Jutongia | 8987 | 0.630 |
| Anaerostipes | 9389 | 0.808 |
| Qiania | 9071 | 0.442 |
| Gluceribacter | 8844 | 0.543 |
| Faecalicatena | 9299 | 0.904 |
| Dorea | 8433 | 0.222 |
| Extibacter | 9504 | 0.074 |
| Merdimonas | 9160 | 0.715 |
| Massilistercora | 9051 | 0.305 |
| Muricomes | 9148.5 | 0.211 |
| Bariatricus | 9342 | 0.262 |
| Hominisplanchenecus | 8927 | 0.629 |
| Drancourtella | 9451.5 | 0.629 |
| Faecalimonas | 9284 | 0.914 |
| Mediterraneibacter | 8653 | 0.376 |
| Oliverpabstia | 8549 | 0.157 |
| Blautia | 9439 | 0.755 |
| Robinsoniella | 9203 | 0.751 |
| Fusicatenibacter | 9418.5 | 0.778 |
| Bilifractor | 9288 | 0.431 |
| Wansuia | 9373 | 0.563 |
| Murimonas | 9311 | 0.571 |
| Jingyaoa | 9228 | 0.989 |
| Marvinbryantia | 9148.5 | 0.211 |
| Lacrimispora | 9191 | 0.948 |
| Hungatella | 9873.5 | 0.239 |
| Mordavella | 9417 | 0.269 |
| Enterocloster | 9322 | 0.894 |
| Lachnoclostridium | 9886.5 | 0.321 |
| Diplocloster | 9869 | 0.020 |
| Lactonifactor | 9149 | 0.816 |
| [Eubacterium] | 9840 | 0.346 |
| Roseburia | 9741 | 0.440 |

Note: Bold values indicate gut microbiota taxa with significant differences in relative abundance between good and poor sleepers (as shown in Figure 2).

**Supplementary Table 6**. Comparison of gut microbiota relative abundance at the species level between subjects with good and poor sleepers.

| Species | Test-Statistic | P |
| --- | --- | --- |
| **Campylobacter_hominis** | **8977.5** | **0.029** |
| Campylobacter_concisus | 9279 | 0.787 |
| Arenibacter_nanhaiticus | 9257.5 | 0.845 |
| Wandonia_haliotis NBRC 105642 | 9292 | 0.817 |
| Capnocytophaga_haemolytica | 9288 | 0.431 |
| Flavobacterium_sediminis | 9342 | 0.262 |
| Flavobacterium_proteolyticum | 9288 | 0.431 |
| Cloacibacterium_normanense | 9063 | 0.075 |
| Chryseobacterium_echinoideorum | 9288 | 0.431 |
| Epilithonimonas_pallida | 9148.5 | 0.211 |
| Rikenella_microfusus | 9288 | 0.431 |
| Tidjanibacter_massiliensis | 9321 | 0.708 |
| Alistipes_communis | 9530 | 0.554 |
| Alistipes_senegalensis JC50 | 9262 | 0.931 |
| Alistipes_provencensis | 9211 | 0.915 |
| Alistipes_timonensis JC136 | 9311 | 0.571 |
| Alistipes_shahii WAL 8301 | 9473.5 | 0.179 |
| Alistipes_shahii | 8772 | 0.458 |
| Alistipes_montrealensis | 9283 | 0.845 |
| Alistipes_finegoldii | 9851 | 0.224 |
| Alistipes_onderdonkii | 8643.5 | 0.326 |
| Alistipes_megaguti | 9288 | 0.431 |
| Alistipes_dispar | 9670 | 0.100 |
| Alistipes_putredinis | 8726 | 0.417 |
| Alistipes_indistinctus YIT 12060 | 9532 | 0.604 |
| Alistipes_ihumii AP11 | 9540 | 0.309 |
| Perlabentimonas_gracilis | 9116 | 0.316 |
| Acetobacteroides_hydrogenigenes | 9108 | 0.508 |
| Millionella_massiliensis | 9342 | 0.262 |
| Gabonibacter_timonensis | 9202 | 0.743 |
| Sanguibacteroides_justesenii | 9283 | 0.769 |
| Gabonibacter_massiliensis | 9257.5 | 0.845 |
| Butyricimonas_synergistica | 9051 | 0.502 |
| Butyricimonas_paravirosa | 8970 | 0.598 |
| Butyricimonas_phoceensis | 9077.5 | 0.724 |
| Butyricimonas_faecihominis | 9089 | 0.765 |
| Butyricimonas_vaginalis | 9057.5 | 0.493 |
| Butyricimonas_virosa | 9454.5 | 0.702 |
| Odoribacter_laneus YIT 12061 | 9063 | 0.075 |
| Culturomica_massiliensis | 9157 | 0.790 |
| Odoribacter_splanchnicus | 9051 | 0.770 |
| Bacteroides_helcogenes | 9312 | 0.566 |
| Bacteroides_gallinarum | 9202 | 0.743 |
| Phocaeicola_dorei | 8715 | 0.388 |
| Phocaeicola_vulgatus ATCC 8482 | 9681.5 | 0.495 |
| Phocaeicola_vulgatus | 9502 | 0.663 |
| Phocaeicola_massiliensis | 9462 | 0.696 |
| Phocaeicola_faecalis | 9304.5 | 0.728 |
| Phocaeicola_sartorii JCM 17136 = DSM 21941 | 9396 | 0.168 |
| Phocaeicola_sartorii JCM 16497 | 8941.5 | 0.351 |
| Phocaeicola_faecicola | 9171 | 0.644 |
| Phocaeicola_plebeius DSM 17135 | 8861 | 0.536 |
| Phocaeicola_coprocola DSM 17136 | 9714.5 | 0.362 |
| Bacteroides_caecigallinarum | 9288 | 0.431 |
| Phocaeicola_coprophilus | 9440 | 0.520 |
| Caecibacteroides_pullorum | 8961 | 0.151 |
| Bacteroides_togonis | 9342 | 0.262 |
| Bacteroides_ndongoniae | 9279 | 0.787 |
| Bacteroides_humanifaecis | 9107 | 0.757 |
| Bacteroides_rodentium JCM 16496 | 9117 | 0.320 |
| Bacteroides_uniformis | 9879 | 0.326 |
| **Bacteroides_fluxus YIT 12057** | **8635.5** | **0.001** |
| Bacteroides_eggerthii | 9565 | 0.533 |
| Bacteroides_propionicigenes | 9224 | 0.950 |
| Bacteroides_stercoris ATCC 43183 | 9415 | 0.776 |
| Bacteroides_clarus YIT 12056 | 8940.5 | 0.547 |
| Bacteroides_cellulosilyticus | 9544.5 | 0.614 |
| Bacteroides_oleiciplenus YIT 12058 | 9031 | 0.134 |
| Bacteroides_stercorirosoris JCM 17103 | 9024.5 | 0.298 |
| Bacteroides_intestinalis | 9439 | 0.699 |
| Bacteroides_bouchesdurhonensis | 9156 | 0.700 |
| Bacteroides_caccae | 9198 | 0.956 |
| Bacteroides_xylanisolvens XB1A | 9429.5 | 0.764 |
| Bacteroides_zhangwenhongii | 9174 | 0.903 |
| Bacteroides_finegoldii | 9710 | 0.313 |
| Bacteroides_ovatus | 8581.5 | 0.316 |
| Bacteroides_faecis MAJ27 | 9244 | 0.960 |
| Bacteroides_thetaiotaomicron | 9413 | 0.785 |
| Bacteroides_congonensis | 9436 | 0.316 |
| Bacteroides_luhongzhouii | 8947 | 0.058 |
| Bacteroides_faecalis | 9288 | 0.431 |
| Bacteroides_faecichinchillae JCM 17102 | 9310 | 0.576 |
| Bacteroides_salyersiae | 8761.5 | 0.401 |
| Bacteroides_nordii WAL 11050 = JCM 12987 | 8994 | 0.649 |
| Bacteroides_fragilis | 8667.5 | 0.294 |
| Bacteroides_cutis | 9202 | 0.743 |
| Paraprevotella_xylaniphila YIT 11841 | 9470 | 0.307 |
| Paraprevotella_clara | 9266 | 0.954 |
| Bacteroides_mediterraneensis | 9288 | 0.431 |
| Paraprevotella_clara YIT 11840 | 9288 | 0.431 |
| Paraprevotella_xylaniphila | 9342 | 0.262 |
| Metaprevotella_massiliensis | 9288 | 0.431 |
| Prevotella_herbatica | 9245.5 | 0.963 |
| Prevotella_nanceiensis | 9288 | 0.431 |
| Prevotella_timonensis 4401737 = DSM 22865 = JCM 15640 | 9033 | 0.138 |
| Prevotella_scopos JCM 17725 | 9442 | 0.302 |
| Prevotella_hominis | 9146 | 0.725 |
| Prevotella_copri DSM 18205 | 9068 | 0.779 |
| Massiliprevotella_massiliensis | 9334 | 0.576 |
| Prevotella_bivia | 9450 | 0.111 |
| Prevotella_disiens | 8862 | 0.024 |
| Prevotella_corporis | 9363.5 | 0.392 |
| Prevotella_stercorea DSM 18206 | 9971.5 | 0.096 |
| Marseilla_massiliensis | 9249 | 0.939 |
| Prevotella_marseillensis | 9382 | 0.656 |
| Prevotella_rara | 9271 | 0.890 |
| Prevotella_lascolaii | 9127.5 | 0.632 |
| Pseudoprevotella_muciniphila | 8977.5 | 0.029 |
| Prevotella_buccalis | 9214 | 0.927 |
| Prevotellamassilia_timonensis | 9137 | 0.762 |
| Alloprevotella_rava | 9342 | 0.262 |
| Parabacteroides_chinchillae | 9288 | 0.431 |
| Parabacteroides_distasonis | 8974 | 0.691 |
| Parabacteroides_distasonis ATCC 8503 | 9265 | 0.957 |
| Parabacteroides_johnsonii | 8925 | 0.382 |
| Parabacteroides_acidifaciens | 9359 | 0.556 |
| Parabacteroides_merdae | 9305 | 0.914 |
| Parabacteroides_goldsteinii DSM 19448 = WAL 12034 | 8827 | 0.395 |
| Parabacteroides_timonensis | 9106 | 0.502 |
| Parabacteroides_chongii | 8700 | 0.095 |
| Parabacteroides_faecis | 9266 | 0.887 |
| Parabacteroides_gordonii | 8868 | 0.202 |
| Porphyromonas_pasteri | 9288 | 0.431 |
| Porphyromonas_catoniae ATCC 51270 | 9288 | 0.431 |
| Porphyromonas_asaccharolytica DSM 20707 | 9148.5 | 0.211 |
| Porphyromonas_somerae DSM 23386 | 9202 | 0.743 |
| Sodaliphilus_pleomorphus | 9257.5 | 0.845 |
| Duncaniella_dubosii | 9388 | 0.419 |
| Duncaniella_freteri | 9078 | 0.650 |
| Duncaniella_muris | 9177.5 | 0.868 |
| Muribaculum_gordoncarteri | 8798 | 0.266 |
| Barnesiella_intestinihominis | 9111.5 | 0.828 |
| Coprobacter_secundus subsp. similis | 9309 | 0.582 |
| Gabonia_massiliensis | 8988 | 0.414 |
| Coprobacter_fastidiosus NSB1 | 9134 | 0.790 |
| Puia_dinghuensis | 9288 | 0.431 |
| Hymenobacter_daeguensis | 9202 | 0.743 |
| Methanobrevibacter_smithii ATCC 35061 | 9288 | 0.431 |
| Amazoninema_brasiliense | 9148.5 | 0.211 |
| Sinocapsa_zengkensis | 9256.5 | 0.851 |
| Vampirovibrio_chlorellavorus | 8970 | 0.165 |
| Stenotrophomonas_maltophilia | 9171 | 0.644 |
| Pseudoxanthomonas_suwonensis | 9148.5 | 0.211 |
| Acidibacter_ferrireducens | 9396 | 0.168 |
| Aquicella_siphonis | 9288 | 0.431 |
| Tepidiphilus_succinatimandens | 9342 | 0.262 |
| Neisseria_elongata subsp. nitroreducens | 9148.5 | 0.211 |
| Neisseria_macacae | 9148.5 | 0.211 |
| Neisseria_perflava | 9224 | 0.950 |
| Alcaligenes_faecalis | 9148.5 | 0.211 |
| Turicimonas_muris | 9014 | 0.377 |
| Parasutterella_excrementihominis | 8642 | 0.271 |
| Mesosutterella_multiformis | 9363 | 0.646 |
| Dakarella_massiliensis | 8615.5 | 0.134 |
| Sutterella_stercoricanis | 9148.5 | 0.211 |
| Sutterella_massiliensis | 9733.5 | 0.321 |
| Sutterella_parvirubra YIT 11816 | 9504 | 0.074 |
| Sutterella_seckii | 9396 | 0.168 |
| Sutterella_wadsworthensis | 9360 | 0.814 |
| Sutterella_megalosphaeroides | 9332 | 0.584 |
| Sutterella_timonensis | 9289 | 0.826 |
| Duodenibacillus_massiliensis | 9121 | 0.824 |
| Parasutterella_secunda | 9385 | 0.637 |
| Methyloversatilis_discipulorum | 9288 | 0.431 |
| Burkholderia_contaminans | 9148.5 | 0.211 |
| Ralstonia_mannitolilytica | 9148.5 | 0.211 |
| Massilia_putida | 9102 | 0.488 |
| Massilia_haematophila | 9063 | 0.075 |
| Massilia_phosphatilytica | 9033 | 0.138 |
| Massilia_rhizosphaerae | 9225 | 0.955 |
| Massilia_brevitalea | 9342 | 0.262 |
| Oxalobacter_formigenes | 10013 | 0.039 |
| Herbaspirillum_huttiense subsp. putei IAM 15032 | 9342 | 0.262 |
| Herbaspirillum_huttiense | 9342 | 0.262 |
| Herbaspirillum_aquaticum | 9288 | 0.431 |
| Quisquiliibacterium_transsilvanicum | 9148.5 | 0.211 |
| Ideonella_dechloratans | 9148.5 | 0.211 |
| Roseateles_depolymerans | 9148.5 | 0.211 |
| Comamonas_jiangduensis | 9203 | 0.751 |
| Delftia_acidovorans | 9310 | 0.576 |
| Acidovorax_cattleyae | 9257.5 | 0.845 |
| Diaphorobacter_nitroreducens | 9063 | 0.075 |
| Variovorax_rhizosphaerae | 9252 | 0.927 |
| Curvibacter_gracilis | 9255.5 | 0.858 |
| Moraxella_osloensis | 8912.5 | 0.071 |
| Acinetobacter_baumannii | 9063 | 0.075 |
| Acinetobacter_parvus | 9148.5 | 0.211 |
| Acinetobacter_johnsonii | 9203 | 0.751 |
| Pseudomonas_aeruginosa | 8907.5 | 0.231 |
| Pseudomonas_koreensis | 9288 | 0.431 |
| Pseudomonas_poae | 9390 | 0.413 |
| Pseudomonas_fragi | 9342 | 0.262 |
| Pseudomonas_yamanorum | 9026 | 0.403 |
| Pseudomonas_migulae | 9148.5 | 0.211 |
| Succinatimonas_hippei YIT 12066 | 9515.5 | 0.241 |
| Succinivibrio_dextrinosolvens | 9234 | 1.000 |
| Pseudaeromonas_sharmana | 9288 | 0.431 |
| Aeromonas_caviae | 9202 | 0.743 |
| Aeromonas_veronii bv. veronii | 9202 | 0.743 |
| Haemophilus_sputorum CCUG 13788 | 9311 | 0.571 |
| Haemophilus_pittmaniae | 9288 | 0.431 |
| Haemophilus_parainfluenzae ATCC 33392 | 9842 | 0.242 |
| Haemophilus_parahaemolyticus | 9288 | 0.431 |
| Haemophilus_seminalis | 9288 | 0.431 |
| Aggregatibacter_aphrophilus ATCC 33389 | 9396 | 0.168 |
| Aggregatibacter_kilianii | 9288 | 0.431 |
| Plesiomonas_shigelloides | 9032 | 0.136 |
| Alishewanella_jeotgali KCTC 22429 | 9288 | 0.431 |
| Alishewanella_fetalis | 9203 | 0.751 |
| Serratia_quinivorans | 9309 | 0.582 |
| Serratia_grimesii | 9202 | 0.743 |
| Serratia_marcescens | 9288 | 0.431 |
| Serratia_surfactantfaciens | 9288 | 0.431 |
| Klebsiella_aerogenes | 9307.5 | 0.716 |
| Klebsiella_aerogenes KCTC 2190 | 9416 | 0.271 |
| Kluyvera_cryocrescens | 9148.5 | 0.211 |
| Kluyvera_ascorbata ATCC 33433 | 9202 | 0.743 |
| Kluyvera_ascorbata | 9256.5 | 0.851 |
| Kluyvera_sichuanensis | 9288 | 0.431 |
| Pseudocitrobacter_vendiensis | 9225 | 0.955 |
| Kluyvera_georgiana | 9055 | 0.316 |
| Enterobacter_soli ATCC BAA-2102 | 9288 | 0.431 |
| Lelliottia_amnigena | 9148.5 | 0.211 |
| Raoultella_planticola | 9031 | 0.134 |
| Raoultella_ornithinolytica | 9187.5 | 0.796 |
| Enterobacter_kobei | 9148.5 | 0.211 |
| Klebsiella_oxytoca | 9198.5 | 0.844 |
| Phytobacter_diazotrophicus | 9342 | 0.262 |
| Klebsiella_pasteurii | 9283 | 0.769 |
| Klebsiella_grimontii | 9202 | 0.743 |
| Enterobacter_mori | 9332 | 0.584 |
| Enterobacter_quasiroggenkampii | 9432 | 0.587 |
| Enterobacter_wuhouensis | 9232 | 0.996 |
| Enterobacter_chengduensis | 9374 | 0.684 |
| Enterobacter_ludwigii | 9075 | 0.453 |
| Leclercia_adecarboxylata | 9342 | 0.262 |
| Enterobacter_quasihormaechei | 9153 | 0.805 |
| Pluralibacter_gergoviae ATCC 33028 = NBRC 105706 | 9148.5 | 0.211 |
| Pseudenterobacter_timonensis | 9288 | 0.431 |
| Escherichia_coli | 9024.5 | 0.466 |
| Shigella_flexneri | 9064 | 0.793 |
| Escherichia_fergusonii ATCC 35469 | 8718 | 0.207 |
| Shigella_boydii | 9210 | 0.933 |
| Shigella_dysenteriae | 9478 | 0.534 |
| Shigella_sonnei | 9522 | 0.565 |
| Shimwellia_blattae DSM 4481 = NBRC 105725 | 9288 | 0.431 |
| Citrobacter_telavivensis | 9342 | 0.262 |
| Citrobacter_farmeri | 9309 | 0.582 |
| Citrobacter_amalonaticus | 9309 | 0.582 |
| Salmonella_enterica subsp. enterica serovar Typhi | 9288 | 0.431 |
| Salmonella_enterica subsp. enterica | 9288 | 0.431 |
| Salmonella_enterica subsp. enterica serovar Typhimurium | 9288 | 0.431 |
| Citrobacter_koseri | 9052 | 0.307 |
| Pseudocitrobacter_faecalis | 9288 | 0.431 |
| Cronobacter_sakazakii | 9202 | 0.743 |
| Atlantibacter_hermannii | 9148.5 | 0.211 |
| Phytobacter_palmae | 9288 | 0.431 |
| Klebsiella_quasivariicola | 9109 | 0.656 |
| Klebsiella_africana | 8869 | 0.443 |
| Klebsiella_pneumoniae subsp. rhinoscleromatis | 8912 | 0.506 |
| Klebsiella_pneumoniae | 8977.5 | 0.676 |
| Klebsiella_quasipneumoniae subsp. similipneumoniae | 8932 | 0.240 |
| Enterobacter_cloacae subsp. dissolvens | 9138.5 | 0.668 |
| Enterobacter_cloacae | 9475.5 | 0.175 |
| Enterobacter_chuandaensis | 9226 | 0.960 |
| Enterobacter_sichuanensis | 9546 | 0.239 |
| Citrobacter_freundii ATCC 8090 = MTCC 1658 = NBRC 12681 | 9011 | 0.370 |
| Citrobacter_cronae | 9228 | 0.971 |
| Citrobacter_pasteurii | 9363.5 | 0.392 |
| Citrobacter_murliniae | 9112 | 0.522 |
| Citrobacter_freundii | 9301.5 | 0.739 |
| Citrobacter_braakii | 9332 | 0.584 |
| Pantoea_agglomerans | 9288 | 0.431 |
| Morganella_morganii | 9278 | 0.792 |
| Providencia_huaxiensis | 9148.5 | 0.211 |
| Providencia_rettgeri | 9148.5 | 0.211 |
| Providencia_vermicola | 9116 | 0.316 |
| Proteus_mirabilis | 9203 | 0.751 |
| Caldovatus_sediminis | 9148.5 | 0.211 |
| Roseomonas_mucosa | 9288 | 0.431 |
| Phreatobacter_oligotrophus | 9288 | 0.431 |
| Bradyrhizobium_embrapense | 9334.5 | 0.758 |
| Tardiphaga_robiniae | 9288 | 0.431 |
| Rhodopseudomonas_pseudopalustris | 9148.5 | 0.211 |
| Methylobacterium_gregans | 9088.5 | 0.336 |
| Methylobacterium_hispanicum | 8917 | 0.170 |
| Methylobacterium_radiotolerans JCM 2831 | 9277 | 0.848 |
| Methylobacterium_tardum | 9165 | 0.783 |
| Methylobacterium_oryzae CBMB20 | 9223 | 0.960 |
| Methylobacterium_persicinum | 9162 | 0.722 |
| Methylobacterium_aerolatum | 9226 | 0.960 |
| Methylobacterium_komagatae DSM 19563 | 9104 | 0.589 |
| Methylorubrum_rhodinum | 9148.5 | 0.211 |
| Methylobacterium_nonmethylotrophicum | 9171 | 0.644 |
| Methylobacterium_aquaticum | 9342 | 0.262 |
| Methylobacterium_currus | 9336 | 0.568 |
| Methylobacterium_durans | 9148.5 | 0.211 |
| Brevundimonas_huaxiensis | 9396 | 0.168 |
| Brevundimonas_staleyi | 9288 | 0.431 |
| Paracoccus_kocurii | 9288 | 0.431 |
| Paracoccus_aeridis | 9288 | 0.431 |
| Paracoccus_marinus | 9342 | 0.262 |
| Rhizobium_qilianshanense | 9148.5 | 0.211 |
| Shinella_curvata | 9288 | 0.431 |
| Tianweitania_sediminis | 9148.5 | 0.211 |
| Sphingomonas_floccifaciens | 9148.5 | 0.211 |
| Sphingomonas_palmae | 9342.5 | 0.674 |
| Sphingomonas_glacialis | 9193.5 | 0.822 |
| Sphingomonas_gellani | 9148.5 | 0.211 |
| Sphingomonas_yunnanensis | 9133.5 | 0.651 |
| Sphingomonas_melonis | 9137.5 | 0.664 |
| Sphingomonas_leidyi | 9396 | 0.168 |
| Sphingomonas_dokdonensis | 9288 | 0.431 |
| Sphingomonas_roseiflava | 9355 | 0.569 |
| **Sphingomonas_aquatilis** | **8863** | **0.025** |
| Sphingomonas_asaccharolytica | 9288 | 0.431 |
| Sphingomonas_adhaesiva | 9063 | 0.075 |
| Sphingomonas_carri | 9142 | 0.579 |
| Sphingomonas_yabuuchiae | 9288 | 0.431 |
| Sphingomonas_pseudosanguinis | 9288 | 0.431 |
| Sphingomonas_sanguinis | 9301.5 | 0.739 |
| Sphingomonas_jatrophae | 9342 | 0.262 |
| Sphingomonas_sinipercae | 9148.5 | 0.211 |
| Sphingomonas_fonticola | 9148.5 | 0.211 |
| Qipengyuania_sediminis | 9288 | 0.431 |
| Novosphingobium_panipatense | 9249 | 0.939 |
| Sphingomonas_profundi | 9288 | 0.431 |
| Oleisolibacter_albus | 9148.5 | 0.211 |
| Anaplasma_phagocytophilum | 9148.5 | 0.211 |
| Cohaesibacter_intestini | 9420 | 0.261 |
| Pseudaquidulcibacter_saccharophilus | 9288 | 0.431 |
| Aestuariispira_insulae | 9711 | 0.096 |
| Kiloniella_spongiae | 9148.5 | 0.211 |
| Azospirillum_formosense | 9148.5 | 0.211 |
| Magnetospira_thiophila | 9148.5 | 0.211 |
| Deinococcus_aquiradiocola | 9301.5 | 0.739 |
| Bilophila_wadsworthia | 8675 | 0.383 |
| Mailhella_massiliensis | 9416.5 | 0.411 |
| Desulfovibrio_piger | 9102 | 0.701 |
| Desulfovibrio_desulfuricans | 9455.5 | 0.417 |
| Desulfovibrio_porci | 9408 | 0.512 |
| Desulfovibrio_simplex | 9116 | 0.316 |
| Desulfovibrio_legallii | 9255 | 0.914 |
| Enorma_phocaeensis | 9086.5 | 0.330 |
| Enorma_shizhengliae | 8892 | 0.012 |
| Collinsella_intestinalis | 9732.5 | 0.067 |
| Collinsella_bouchesdurhonensis | 9342 | 0.262 |
| Collinsella_aerofaciens | 9724 | 0.438 |
| Collinsella_tanakaei YIT 12063 | 9210 | 0.952 |
| Paratractidigestivibacter_faecalis | 9332 | 0.584 |
| Tractidigestivibacter_scatoligenes | 9476 | 0.347 |
| Lancefieldella_rimae | 9148.5 | 0.211 |
| Lancefieldella_parvula DSM 20469 | 9245 | 0.956 |
| Olsenella_timonensis | 9148.5 | 0.211 |
| Thermophilibacter_provencensis | 9148.5 | 0.211 |
| Olsenella_phocaeensis | 9288 | 0.431 |
| Adlercreutzia_caecimuris B7 | 9288 | 0.431 |
| Eggerthella_guodeyinii | 9470.5 | 0.185 |
| Eggerthella_lenta | 9216 | 0.961 |
| Gordonibacter_massiliensis | 9279 | 0.787 |
| Gordonibacter_urolithinfaciens | 9450 | 0.111 |
| Gordonibacter_pamelaeae 7-10-1-b | 9336 | 0.568 |
| Eggerthella_sinensis JCM 14551 | 9312 | 0.566 |
| Parvibacter_caecicola | 9504 | 0.074 |
| Raoultibacter_massiliensis | 9288 | 0.431 |
| Raoultibacter_timonensis | 9066.5 | 0.706 |
| Paraeggerthella_hongkongensis JCM 14552 | 9148.5 | 0.211 |
| Adlercreutzia_equolifaciens | 8921 | 0.361 |
| Adlercreutzia_equolifaciens subsp. celatus | 9368 | 0.687 |
| Slackia_isoflavoniconvertens | 9417 | 0.269 |
| Slackia_piriformis YIT 12062 | 9525 | 0.126 |
| Slackia_faecicanis | 9203 | 0.751 |
| Ellagibacter_isourolithinifaciens | 9288 | 0.431 |
| Senegalimassilia_faecalis | 9288 | 0.431 |
| Senegalimassilia_anaerobia JC110 | 9205 | 0.912 |
| Lawsonella_clevelandensis | 9288 | 0.431 |
| Corynebacterium_durum | 9288 | 0.431 |
| Corynebacterium_argentoratense | 9342 | 0.262 |
| Corynebacterium_tuberculostearicum | 9288 | 0.431 |
| Corynebacterium_accolens | 9288 | 0.431 |
| Corynebacterium_tuscaniense | 9288 | 0.431 |
| Corynebacterium_gottingense | 9288 | 0.431 |
| Corynebacterium_ureicelerivorans | 9148.5 | 0.211 |
| Williamsia_serinedens | 9148.5 | 0.211 |
| Rhodococcus_qingshengii | 9342 | 0.262 |
| Nocardia_coeliaca | 9202 | 0.743 |
| Micromonospora_narathiwatensis | 9288 | 0.431 |
| Propionibacterium_acidifaciens | 9288 | 0.431 |
| Cutibacterium_modestum | 9288 | 0.431 |
| Cutibacterium_acnes | 9427 | 0.547 |
| Brachybacterium_paraconglomeratum | 9288 | 0.431 |
| Peptidiphaga_gingivicola | 9148.5 | 0.211 |
| Schaalia_odontolytica | 9163 | 0.726 |
| Actinomyces_marseillensis | 9118 | 0.325 |
| Actinomyces_bouchesdurhonensis | 9288 | 0.431 |
| Actinomyces_oris | 9288 | 0.431 |
| Actinomyces_dentalis | 9288 | 0.431 |
| Alloscardovia_omnicolens | 9288 | 0.431 |
| Gardnerella_vaginalis ATCC 14018 = JCM 11026 | 9288 | 0.431 |
| Bifidobacterium_breve DSM 20213 = JCM 1192 | 9342 | 0.262 |
| Bifidobacterium_longum subsp. suillum | 9616.5 | 0.522 |
| Bifidobacterium_longum subsp. infantis | 9342 | 0.262 |
| Bifidobacterium_pseudolongum subsp. globosum | 9148.5 | 0.211 |
| Bifidobacterium_animalis subsp. lactis | 9396 | 0.168 |
| Bifidobacterium_catenulatum subsp. kashiwanohense JCM 15439 = DSM 21854 | 9342 | 0.262 |
| Bifidobacterium_dentium | 9349.5 | 0.654 |
| Bifidobacterium_adolescentis ATCC 15703 | 9199 | 0.937 |
| Bifidobacterium_adolescentis JCM 15918 | 8757 | 0.120 |
| Bifidobacterium_faecale | 8969 | 0.599 |
| Bifidobacterium_catenulatum | 9116 | 0.316 |
| Bifidobacterium_pseudocatenulatum | 9254 | 0.973 |
| Bifidobacterium_bifidum | 9236.5 | 0.995 |
| Microbacterium_testaceum | 9288 | 0.431 |
| Microbacterium_paulum | 9288 | 0.431 |
| Microbacterium_oxydans | 9148.5 | 0.211 |
| Microbacterium_foliorum | 9087.5 | 0.333 |
| Kocuria_palustris | 9148.5 | 0.211 |
| Kocuria_rhizophila | 9288 | 0.431 |
| Rothia_dentocariosa ATCC 17931 | 9148.5 | 0.211 |
| Rothia_mucilaginosa | 10014 | 0.027 |
| **Dermacoccus_nishinomiyaensis** | **8977.5** | **0.029** |
| Lapillicoccus_jejuensis | 9118 | 0.325 |
| Gemmata_palustris | 9148.5 | 0.211 |
| Victivallis_lenta | 9395 | 0.675 |
| Victivallis_vadensis | 8909 | 0.160 |
| Akkermansia_muciniphila | 9069 | 0.759 |
| Ruficoccus_amylovorans | 9148.5 | 0.211 |
| Coraliomargarita_sinensis | 9202 | 0.743 |
| Coraliomargarita_akajimensis | 9112 | 0.522 |
| Cloacibacillus_evryensis | 9162 | 0.722 |
| Cloacibacillus_porcorum | 9828 | 0.025 |
| Pyramidobacter_porci | 9288 | 0.431 |
| Pyramidobacter_piscolens | 9362.5 | 0.618 |
| Leptotrichia_massiliensis | 9148.5 | 0.211 |
| Pseudoleptotrichia_goodfellowii | 9202 | 0.743 |
| Fusobacterium_perfoetens | 9491 | 0.225 |
| Fusobacterium_mortiferum | 9567 | 0.298 |
| Fusobacterium_varium | 8976 | 0.590 |
| Asteroleplasma_anaerobium | 9203 | 0.751 |
| Solobacterium_moorei | 9251 | 0.931 |
| Bacillus_smithii | 9203 | 0.751 |
| Spiroplasma_diminutum CUAS-1 | 9288 | 0.431 |
| Spiroplasma_velocicrescens | 9293 | 0.814 |
| Haploplasma_axanthum | 9369 | 0.667 |
| Spiroplasma_chinense | 9256 | 0.953 |
| Rummeliibacillus_stabekisii | 9117 | 0.320 |
| Breznakia_pachnodae | 9057 | 0.573 |
| Ornithinibacillus_contaminans | 9250 | 0.935 |
| Haloplasma_contractile SSD-17B | 9309 | 0.582 |
| Holdemania_filiformis | 9116 | 0.810 |
| Bacillus_paralicheniformis | 9288 | 0.431 |
| Rossellomorea_vietnamensis | 9249 | 0.939 |
| Spiroplasma_eriocheiris CCTCC M 207170 | 9179 | 0.813 |
| Holdemania_massiliensis AP2 | 9485 | 0.394 |
| Stecheria_intestinalis | 9288 | 0.431 |
| Lactimicrobium_massiliense | 9419 | 0.263 |
| Bulleidia_extructa | 9203 | 0.751 |
| Holdemanella_porci | 9021 | 0.677 |
| Holdemanella_biformis | 9599.5 | 0.334 |
| Faecalibaculum_rodentium | 9148.5 | 0.211 |
| Allobaculum_stercoricanis DSM 13633 | 9419 | 0.263 |
| Absicoccus_porci | 9255.5 | 0.858 |
| Faecalicoccus_pleomorphus | 9148.5 | 0.211 |
| Faecalitalea_cylindroides | 9256.5 | 0.851 |
| Merdibacter_massiliensis | 9288 | 0.431 |
| Massilicoli_timonensis | 9148.5 | 0.211 |
| Amedibacterium_intestinale | 9381 | 0.440 |
| Amedibacillus_dolichus | 8895 | 0.351 |
| Longicatena_caecimuris | 9417 | 0.269 |
| Erysipelatoclostridium_[Clostridium] innocuum | 8829 | 0.391 |
| Copranaerobaculum_intestinale | 9148.5 | 0.211 |
| Dielma_fastidiosa | 9276 | 0.890 |
| Beduini_massiliensis | 9255.5 | 0.858 |
| Erysipelatoclostridium_[Clostridium] spiroforme | 8353 | 0.013 |
| Erysipelatoclostridium_[Clostridium] cocleatum | 9202 | 0.743 |
| Erysipelatoclostridium_ramosum | 8883.5 | 0.466 |
| Erysipelatoclostridium_[Clostridium] saccharogumia | 9140 | 0.571 |
| Faecalibacillus_faecis | 8905.5 | 0.228 |
| Faecalibacillus_intestinalis | 8858 | 0.552 |
| Massilimicrobiota_timonensis | 8754 | 0.078 |
| Longibaculum_muris | 9122 | 0.673 |
| Coprobacillus_cateniformis JCM 10604 | 9293 | 0.855 |
| Catenibacterium_mitsuokai | 8490 | 0.080 |
| Bacillus_shivajii | 9288 | 0.431 |
| Polycladomyces_abyssicola | 9148.5 | 0.211 |
| Aneurinibacillus_thermoaerophilus | 9148.5 | 0.211 |
| Paenibacillus_flagellatus | 9148.5 | 0.211 |
| Tumebacillus_lipolyticus | 9288 | 0.431 |
| Geobacillus_kaustophilus | 9148.5 | 0.211 |
| Parageobacillus_thermantarcticus | 9288 | 0.431 |
| Bacillus_subtilis | 9288 | 0.431 |
| Bacillus_yapensis | 9148.5 | 0.211 |
| Niallia_circulans | 9148.5 | 0.211 |
| Robertmurraya_kyonggiensis | 9288 | 0.431 |
| Mammaliicoccus_sciuri | 9148.5 | 0.211 |
| Staphylococcus_ureilyticus | 9202 | 0.743 |
| Staphylococcus_warneri | 9202 | 0.743 |
| Staphylococcus_aureus | 9288 | 0.431 |
| Staphylococcus_epidermidis | 9139 | 0.567 |
| Staphylococcus_capitis | 9189.5 | 0.805 |
| Staphylococcus_hominis | 9116 | 0.316 |
| Carnobacterium_divergens | 9288 | 0.431 |
| Globicatella_sanguinis | 9288 | 0.431 |
| Abiotrophia_defectiva | 9257.5 | 0.845 |
| Granulicatella_elegans | 9381 | 0.755 |
| Granulicatella_adiacens | 9140 | 0.571 |
| Ligilactobacillus_saerimneri | 9148.5 | 0.211 |
| Ligilactobacillus_salivarius | 9252 | 0.954 |
| Ligilactobacillus_agilis | 9288 | 0.431 |
| Ligilactobacillus_ruminis | 9082.5 | 0.317 |
| Ligilactobacillus_acidipiscis | 9257.5 | 0.845 |
| Pediococcus_acidilactici DSM 20284 | 9288 | 0.431 |
| Lacticaseibacillus_rhamnosus | 9288 | 0.431 |
| Lacticaseibacillus_paracasei | 9281 | 0.778 |
| Latilactobacillus_sakei | 9288 | 0.431 |
| Lactiplantibacillus_pentosus | 9082.5 | 0.317 |
| Companilactobacillus_ginsenosidimutans | 9148.5 | 0.211 |
| Companilactobacillus_versmoldensis | 9148.5 | 0.211 |
| Companilactobacillus_pabuli | 9288 | 0.431 |
| Companilactobacillus_kimchii | 9288 | 0.431 |
| Limosilactobacillus_oris | 9148.5 | 0.211 |
| Limosilactobacillus_frumenti | 9148.5 | 0.211 |
| Limosilactobacillus_urinaemulieris | 9031 | 0.134 |
| Limosilactobacillus_fermentum | 9074 | 0.451 |
| Limosilactobacillus_mucosae | 9515.5 | 0.241 |
| Lactobacillus_paragasseri | 8923 | 0.226 |
| Lactobacillus_gasseri ATCC 33323 = JCM 1131 | 9288 | 0.431 |
| Lactobacillus_johnsonii | 9257.5 | 0.845 |
| Lactobacillus_delbrueckii subsp. sunkii | 9202 | 0.743 |
| Lactobacillus_delbrueckii subsp. bulgaricus | 9117 | 0.320 |
| Lactobacillus_delbrueckii subsp. lactis DSM 20072 | 9288 | 0.431 |
| Lactobacillus_delbrueckii subsp. indicus | 9330 | 0.591 |
| Lactobacillus_acidophilus | 9336 | 0.568 |
| Lactobacillus_amylovorus DSM 20531 | 9311 | 0.571 |
| Lactobacillus_crispatus | 9309.5 | 0.709 |
| Leuconostoc_mesenteroides subsp. dextranicum | 9288 | 0.431 |
| Leuconostoc_mesenteroides subsp. jonggajibkimchii | 9288 | 0.431 |
| Leuconostoc_citreum | 9288 | 0.431 |
| Leuconostoc_lactis KCTC 3528 = DSM 20202 | 9541 | 0.247 |
| Weissella_confusa | 9270 | 0.873 |
| Weissella_cibaria | 9396 | 0.168 |
| Weissella_viridescens | 9342 | 0.262 |
| Weissella_koreensis | 9148.5 | 0.211 |
| Streptococcus_mutans | 9196.5 | 0.835 |
| Streptococcus_downei MFe28 | 9342 | 0.262 |
| Streptococcus_alactolyticus | 9063 | 0.075 |
| Streptococcus_macedonicus | 9396 | 0.168 |
| Streptococcus_pasteurianus | 8902 | 0.151 |
| Streptococcus_lutetiensis | 9029 | 0.410 |
| Streptococcus_anginosus | 9348.5 | 0.657 |
| Streptococcus_vaginalis | 9552 | 0.151 |
| Streptococcus_intermedius | 9203 | 0.751 |
| Streptococcus_constellatus | 9202 | 0.743 |
| Streptococcus_anginosus SK52 = DSM 20563 | 9288 | 0.431 |
| Streptococcus_parasuis | 9288 | 0.431 |
| Streptococcus_sinensis | 9288 | 0.431 |
| Streptococcus_cristatus ATCC 51100 | 9098 | 0.572 |
| Streptococcus_sanguinis | 9468 | 0.312 |
| Streptococcus_gordonii | 9632 | 0.246 |
| Streptococcus_salivarius | 9435.5 | 0.754 |
| Streptococcus_thermophilus | 9256 | 0.948 |
| Streptococcus_vestibularis ATCC 49124 | 9342 | 0.262 |
| Streptococcus_koreensis | 9759 | 0.232 |
| Streptococcus_oralis subsp. dentisani | 9393 | 0.509 |
| Streptococcus_infantis ATCC 700779 | 10315 | 0.003 |
| Streptococcus_gwangjuense | 9117 | 0.320 |
| Streptococcus_oralis ATCC 35037 | 9402 | 0.600 |
| Streptococcus_mitis | 9220 | 0.961 |
| Streptococcus_vulneris | 9360 | 0.553 |
| Streptococcus_pseudopneumoniae | 9255.5 | 0.858 |
| Streptococcus_toyakuensis | 8761 | 0.083 |
| Streptococcus_shenyangsis | 9148.5 | 0.211 |
| Streptococcus_downii | 9396 | 0.168 |
| Streptococcus_timonensis | 9107 | 0.505 |
| Streptococcus_oralis subsp. tigurinus AZ_3a | 9279 | 0.866 |
| Streptococcus_australis | 9616.5 | 0.240 |
| Streptococcus_rubneri | 9358 | 0.775 |
| Streptococcus_parasanguinis ATCC 15912 | 8741 | 0.414 |
| Lactococcus_raffinolactis | 9288 | 0.431 |
| Lactococcus_garvieae | 9530.5 | 0.217 |
| Lactococcus_lactis | 9630 | 0.061 |
| Lactococcus_taiwanensis | 9342 | 0.262 |
| Enterococcus_innesii | 9365.5 | 0.385 |
| Enterococcus_avium ATCC 14025 | 9116 | 0.316 |
| Enterococcus_mundtii | 9288 | 0.431 |
| Enterococcus_hirae | 9504 | 0.074 |
| Enterococcus_durans | 9148.5 | 0.211 |
| Enterococcus_faecium | 9277 | 0.848 |
| Enterococcus_gilvus | 9148.5 | 0.211 |
| Enterococcus_asini | 9148.5 | 0.211 |
| Tetragenococcus_halophilus subsp. halophilus DSM 20339 | 9148.5 | 0.211 |
| Enterococcus_faecalis | 9702 | 0.060 |
| Enterococcus_bulliens | 9148.5 | 0.211 |
| Enterococcus_saccharolyticus subsp. saccharolyticus ATCC 43076 | 9288 | 0.431 |
| Gemella_morbillorum | 9396 | 0.168 |
| Gemella_haemolysans | 9052 | 0.307 |
| Gemella_sanguinis | 9151 | 0.740 |
| Turicibacter_sanguinis | 8932.5 | 0.336 |
| Turicibacter_bilis | 9181 | 0.858 |
| Anaeroplasma_abactoclasticum | 9148.5 | 0.211 |
| Peptococcus_niger | 9590.5 | 0.274 |
| Desulfonispora_thiosulfatigenes | 9288 | 0.431 |
| Peptococcus_simiae | 9016 | 0.478 |
| Dehalobacterium_formicoaceticum | 9534 | 0.258 |
| Hydrogenispora_ethanolica | 9342 | 0.262 |
| Acidaminococcus_provencensis | 9246 | 0.952 |
| Acidaminococcus_intestini | 8900 | 0.305 |
| Acidaminococcus_timonensis | 9173 | 0.654 |
| Acidaminococcus_fermentans DSM 20731 | 9192.5 | 0.818 |
| Acidaminococcus_massiliensis | 9584 | 0.336 |
| Phascolarctobacterium_faecium | 8533 | 0.277 |
| Phascolarctobacterium_succinatutens | 9496 | 0.421 |
| Veillonella_ratti | 9342 | 0.262 |
| Veillonella_magna | 9342 | 0.262 |
| Veillonella_atypica | 8819 | 0.310 |
| Veillonella_dispar | 9523.5 | 0.557 |
| Veillonella_parvula | 9831.5 | 0.190 |
| Veillonella_denticariosi | 9288 | 0.431 |
| Veillonella_tobetsuensis | 8902 | 0.397 |
| Dialister_micraerophilus | 9288 | 0.431 |
| Dialister_propionicifaciens | 9202 | 0.743 |
| Dialister_pneumosintes | 9342 | 0.262 |
| Allisonella_histaminiformans | 9432.5 | 0.673 |
| Dialister_invisus DSM 15470 | 9030 | 0.488 |
| Dialister_massiliensis | 9525.5 | 0.480 |
| Dialister_succinatiphilus YIT 11850 | 9247 | 0.973 |
| Megasphaera_cerevisiae | 9117 | 0.320 |
| Megasphaera_stantonii | 9366.5 | 0.382 |
| Megasphaera_massiliensis | 9342 | 0.262 |
| Megasphaera_indica | 9573 | 0.315 |
| Megasphaera_elsdenii DSM 20460 | 9249 | 0.939 |
| Megasphaera_hexanoica | 9342 | 0.262 |
| Caecibacter_massiliensis | 9291 | 0.867 |
| Anaeroglobus_geminatus | 9203 | 0.751 |
| Megasphaera_micronuciformis | 9021.5 | 0.291 |
| Massilibacillus_massiliensis | 9148.5 | 0.211 |
| Selenomonas_felix | 9148.5 | 0.211 |
| Mitsuokella_jalaludinii | 9513 | 0.400 |
| Mitsuokella_multacida | 9202 | 0.743 |
| Megamonas_hypermegale | 9288 | 0.431 |
| Megamonas_rupellensis | 9277.5 | 0.935 |
| Megamonas_funiformis YIT 11815 | 9455.5 | 0.548 |
| Acetivibrio_thermocellus | 9203 | 0.751 |
| Ruminiclostridium_josui | 9148.5 | 0.211 |
| Anaerobacterium_chartisolvens | 9921 | 0.203 |
| Acetivibrio_cellulolyticus | 9139 | 0.704 |
| Acetivibrio_aldrichii | 9342 | 0.262 |
| Acetivibrio_alkalicellulosi | 9394 | 0.687 |
| Petroclostridium_xylanilyticum | 9547 | 0.328 |
| Intestinimonas_timonensis | 9420 | 0.762 |
| Sporobacter_termitidis | 9396 | 0.168 |
| Vescimonas_fastidiosa | 8946 | 0.659 |
| Vescimonas_coprocola | 9705 | 0.445 |
| Marseillibacter_massiliensis | 9398 | 0.799 |
| Oscillibacter_massiliensis | 8899.5 | 0.607 |
| Pusillibacter_faecalis | 9625 | 0.444 |
| Dysosmobacter_acutus | 9202 | 0.743 |
| Oscillibacter_valericigenes | 8920 | 0.222 |
| Intestinimonas_gabonensis | 9396 | 0.168 |
| Clostridium_phoceensis | 9677 | 0.490 |
| [Clostridium]_viride | 9288 | 0.431 |
| Intestinimonas_butyriciproducens | 9030 | 0.690 |
| Pseudoflavonifractor_phocaeensis | 8997 | 0.152 |
| Pseudoflavonifractor_capillosus ATCC 29799 | 9288 | 0.431 |
| Flavonifractor_plautii | 8829 | 0.524 |
| Pseudoflavonifractor_gallinarum | 8617.5 | 0.094 |
| Lawsonibacter_asaccharolyticus | 8377 | 0.163 |
| Evtepia_gabavorous | 9919.5 | 0.263 |
| Butyricicoccus_porcorum | 9085.5 | 0.327 |
| Butyricicoccus_intestinisimiae | 9362.5 | 0.396 |
| Butyricicoccus_pullicaecorum | 9196 | 0.884 |
| Agathobaculum_desmolans | 9117 | 0.320 |
| Agathobaculum_butyriciproducens | 8500 | 0.254 |
| Butyricicoccus_faecihominis | 9197.5 | 0.954 |
| Intestinibacillus_massiliensis | 9148.5 | 0.211 |
| Feifania_hominis | 9356 | 0.714 |
| Papillibacter_cinnamivorans | 9037.5 | 0.547 |
| Intestinimonas_massiliensis | 9250 | 0.967 |
| Colidextribacter_massiliensis | 9483 | 0.397 |
| [Clostridium]_cellulosi | 9256.5 | 0.851 |
| Tepidibaculum_saccharolyticum | 9148.5 | 0.211 |
| [Clostridium]_methylpentosum | 9420 | 0.261 |
| Pseudoruminococcus_massiliensis | 8880.5 | 0.294 |
| Anaeromassilibacillus_senegalensis | 8961 | 0.476 |
| Ruminococcus_bromii | 9723 | 0.421 |
| Ruminococcoides_bili | 9178 | 0.896 |
| Ruminococcus_bovis | 9223 | 0.945 |
| [Clostridium]_leptum | 8647 | 0.265 |
| Clostridium_merdae | 8400 | 0.174 |
| Clostridium_minihomine | 9063 | 0.075 |
| Yeguia_hominis | 8945 | 0.056 |
| Caproicibacter_fermentans | 9203 | 0.751 |
| Hydrogeniiclostridium_mannosilyticum | 9132 | 0.807 |
| Caproiciproducens_galactitolivorans | 9494 | 0.425 |
| Eubacterium_coprostanoligenes | 9145 | 0.887 |
| Neglectibacter_timonensis | 8910 | 0.566 |
| Solibaculum_mannosilyticum | 10279.5 | 0.070 |
| [Eubacterium]_siraeum | 9375 | 0.774 |
| Ruminococcus_albus | 8654 | 0.324 |
| Ruminococcus_champanellensis 18P13 = JCM 17042 | 9110.5 | 0.761 |
| Ruminococcus_flavefaciens | 9226 | 0.960 |
| Ruminococcus_callidus | 9721.5 | 0.383 |
| Massilioclostridium_coli | 9270.5 | 0.918 |
| Paludicola_psychrotolerans | 9237 | 0.993 |
| Fumia_xinanensis | 9453 | 0.476 |
| Massiliimalia_massiliensis | 9072 | 0.445 |
| Massiliimalia_timonensis | 9002 | 0.160 |
| Pygmaiobacter_massiliensis | 9288 | 0.431 |
| Fournierella_massiliensis | 8926 | 0.146 |
| Faecalibacterium_prausnitzii | 8822.5 | 0.526 |
| Faecalibacterium_duncaniae | 9181 | 0.936 |
| **Faecalibacterium_butyricigenerans** | **8674** | **0.045** |
| Faecalibacterium_hattorii | 9007 | 0.716 |
| Faecalibacterium_longum | 9777.5 | 0.404 |
| Subdoligranulum_variabile | 9190.5 | 0.809 |
| Gemmiger_formicilis | 9112.5 | 0.851 |
| Gemmiger_gallinarum | 9075 | 0.453 |
| Ruthenibacterium_lactatiformans | 8786 | 0.450 |
| Gorbachella_massiliensis | 8937 | 0.248 |
| Anaerofilum_agile | 9380 | 0.544 |
| Bittarella_massiliensis | 8725.5 | 0.076 |
| Acetanaerobacterium_elongatum | 9162 | 0.722 |
| Phocea_massiliensis | 8352 | 0.150 |
| Angelakisella_massiliensis | 9672 | 0.269 |
| Anaerotruncus_rubiinfantis | 9612 | 0.034 |
| Anaerotruncus_massiliensis | 9031 | 0.134 |
| Anaerotruncus_colihominis | 9339 | 0.767 |
| Marasmitruncus_massiliensis | 9063 | 0.075 |
| Negativibacillus_massiliensis | 8911 | 0.593 |
| Provencibacterium_massiliense | 9143 | 0.716 |
| Monoglobus_pectinilyticus | 9282 | 0.773 |
| Congzhengia_minquanensis | 9311 | 0.571 |
| Acetivibrio_straminisolvens | 8675 | 0.134 |
| **Ructibacterium_gallinarum** | **7586** | **0.011** |
| Acetivibrio_clariflavus DSM 19732 | 9202 | 0.743 |
| Clostridium_sporogenes | 9288 | 0.431 |
| Clostridium_perfringens ATCC 13124 | 9278 | 0.792 |
| Clostridium_perfringens | 9120.5 | 0.610 |
| Clostridium_paraputrificum | 9469 | 0.310 |
| Clostridium_tertium | 9288 | 0.431 |
| Clostridium_saudiense | 9067 | 0.692 |
| Clostridium_jeddahitimonense | 9190.5 | 0.809 |
| Clostridium_disporicum | 9122 | 0.727 |
| Clostridium_chartatabidum | 9086.5 | 0.330 |
| Clostridium_neonatale | 9202 | 0.743 |
| Clostridium_saccharoperbutylacetonicum | 9148.5 | 0.211 |
| Clostridium_butyricum | 9063 | 0.075 |
| Anaerofustis_stercorihominis | 9202 | 0.743 |
| Pseudoramibacter_alactolyticus ATCC 23263 | 9148.5 | 0.211 |
| Eubacterium_maltosivorans | 9329 | 0.595 |
| Eubacterium_limosum | 9226 | 0.960 |
| Eubacterium_callanderi | 9413.5 | 0.419 |
| Parvimonas_micra | 9202 | 0.743 |
| Parvimonas_parva | 9255.5 | 0.858 |
| Ezakiella_coagulans | 8977.5 | 0.029 |
| Anaerosphaera_massiliensis | 9277 | 0.797 |
| Urinicoccus_timonensis | 9288 | 0.431 |
| Peptoniphilus_lacrimalis | 9288 | 0.431 |
| Peptoniphilus_gorbachii | 9288 | 0.431 |
| Peptoniphilus_grossensis ph5 | 9288 | 0.431 |
| Luoshenia_tenuis | 8954 | 0.587 |
| Christensenella_minuta | 9383.5 | 0.620 |
| Christensenella_intestinihominis | 9257.5 | 0.845 |
| Guopingia_tenuis | 9483 | 0.653 |
| Gehongia_tenuis | 9456.5 | 0.590 |
| Christensenella_timonensis | 9148.5 | 0.211 |
| Christensenella_massiliensis | 8894 | 0.483 |
| Christensenella_hongkongensis | 9388.5 | 0.608 |
| Xylanivirga_thermophila | 8803 | 0.042 |
| Peptostreptococcus_stomatis | 9288 | 0.431 |
| Clostridioides_difficile ATCC 9689 = DSM 1296 | 9063 | 0.075 |
| Paraclostridium_benzoelyticum | 9288 | 0.431 |
| Paeniclostridium_[Eubacterium] tenue | 9148.5 | 0.211 |
| **Intestinibacter_bartlettii** | **8106.5** | **0.028** |
| Romboutsia_ilealis | 9288 | 0.431 |
| Romboutsia_timonensis | 9360 | 0.828 |
| Romboutsia_[Clostridium] dakarense | 9333 | 0.580 |
| Terrisporobacter_mayombei | 9034 | 0.387 |
| Terrisporobacter_glycolicus ATCC 14880 = DSM 1288 | 9148.5 | 0.211 |
| Peptacetobacter_hiranonis | 9337 | 0.564 |
| Lentihominibacter_hominis | 9194 | 0.903 |
| Lentihominibacter_faecis | 9036 | 0.642 |
| Zhenpiania_hominis | 8904 | 0.153 |
| Aminipila_butyrica | 9184 | 0.872 |
| Sinanaerobacter_chloroacetimidivorans | 9806 | 0.234 |
| Baileyella_intestinalis | 9288 | 0.431 |
| Mobilibacterium_timonense | 9288 | 0.431 |
| Mogibacterium_neglectum | 9148.5 | 0.211 |
| Congobacterium_massiliense | 9396 | 0.168 |
| Eubacterium_sulci ATCC 35585 | 9256.5 | 0.851 |
| Aminicella_lysinilytica | 9148.5 | 0.211 |
| Emergencia_timonensis | 9165 | 0.783 |
| Ihubacter_massiliensis | 8872 | 0.394 |
| Aminipila_terrae | 9118 | 0.325 |
| Bacilliculturomica_massiliensis | 9203 | 0.751 |
| Cellulosilyticum_lentocellum DSM 5427 | 9148.5 | 0.211 |
| Zhenhengia_yiwuensis | 9202 | 0.743 |
| Bianquea_renquensis | 9366 | 0.638 |
| Tyzzerella_[Clostridium] colinum | 8947.5 | 0.470 |
| Anaerotignum_lactatifermentans | 9322 | 0.819 |
| Anaerotignum_faecicola | 8995 | 0.711 |
| Anaerotignum_propionicum | 9288 | 0.431 |
| Anaerotignum_aminivorans | 9871 | 0.255 |
| Coprococcus_catus | 9480 | 0.652 |
| Catenibacillus_scindens | 9272 | 0.915 |
| Frisingicoccus_caecimuris | 9420 | 0.561 |
| Faecalicatena_fissicatena | 9097.5 | 0.725 |
| Anaerosacchariphilus_polymeriproducens | 8963 | 0.620 |
| Eubacterium_ventriosum | 9001 | 0.714 |
| Howardella_ureilytica | 9761 | 0.040 |
| Lachnospira_pectinoschiza | 8716 | 0.344 |
| Lachnospira_[Eubacterium] eligens ATCC 27750 | 8969 | 0.685 |
| Lactobacillus_rogosae | 8848 | 0.553 |
| Butyribacter_intestini | 9567 | 0.278 |
| Jutongia_hominis | 8985 | 0.436 |
| Eubacterium_xylanophilum | 9301 | 0.864 |
| Wujia_chipingensis | 9638.5 | 0.369 |
| Coprococcus_eutactus | 10169 | 0.052 |
| Lachnoanaerobaculum_saburreum DSM 3986 | 9288 | 0.431 |
| Lachnoanaerobaculum_gingivalis | 9288 | 0.431 |
| Butyrivibrio_crossotus | 9288 | 0.431 |
| Lacrimispora_algidixylanolytica | 9063 | 0.075 |
| Blautia_glucerasea | 8648 | 0.087 |
| Butyrivibrio_fibrisolvens | 9148.5 | 0.211 |
| Oribacterium_sinus | 9148.5 | 0.211 |
| Oribacterium_asaccharolyticum ACB7 | 9063 | 0.075 |
| Kineothrix_alysoides | 9288 | 0.431 |
| Eisenbergiella_massiliensis | 9813 | 0.342 |
| Eisenbergiella_tayi | 9354.5 | 0.712 |
| Waltera_intestinalis | 9038 | 0.765 |
| Fusimonas_intestini | 9155 | 0.752 |
| Konateibacter_massiliensis | 9088 | 0.727 |
| Lachnospira_multipara ATCC 19207 | 9105 | 0.792 |
| Cuneatibacter_caecimuris | 9447.5 | 0.434 |
| Anaerobutyricum_hallii | 9120.5 | 0.824 |
| Anaerobutyricum_soehngenii | 9298 | 0.919 |
| Jutongia_huaianensis | 9281 | 0.918 |
| Anaerostipes_rhamnosivorans | 9288 | 0.431 |
| Anaerostipes_caccae | 9093 | 0.558 |
| Anaerostipes_hominis | 9257.5 | 0.845 |
| Anaerostipes_hadrus | 9570 | 0.592 |
| Anaerostipes_butyraticus | 9063 | 0.075 |
| Qiania_dongpingensis | 9071 | 0.442 |
| Acetivibrio_ethanolgignens | 9279 | 0.787 |
| Gluceribacter_canis | 8844 | 0.543 |
| Faecalicatena_contorta | 8866.5 | 0.399 |
| Mediterraneibacter_butyricigenes | 9315.5 | 0.803 |
| Mediterraneibacter_glycyrrhizinilyticus | 8639 | 0.116 |
| Mediterraneibacter_[Ruminococcus] faecis JCM 15917 | 9958 | 0.211 |
| Mediterraneibacter_[Ruminococcus] torques | 9719.5 | 0.446 |
| Mediterraneibacter_massiliensis | 9248 | 0.967 |
| Mediterraneibacter_[Ruminococcus] lactaris ATCC 29176 | 8762 | 0.382 |
| Faecalicatena_faecalis | 9226 | 0.960 |
| Faecalicatena_orotica | 9324 | 0.742 |
| Corynebacterium_dentalis | 9478 | 0.606 |
| Dorea_longicatena | 8572 | 0.306 |
| Dorea_phocaeensis | 9254 | 0.976 |
| Extibacter_muris | 9504 | 0.074 |
| Lachnoclostridium_[Clostridium] scindens | 9709.5 | 0.249 |
| Lachnoclostridium_[Clostridium] hylemonae | 9173 | 0.654 |
| Lachnoclostridium_phocaeense | 8804 | 0.124 |
| Merdimonas_faecis | 9160 | 0.715 |
| Massilistercora_timonensis | 9051 | 0.305 |
| Muricomes_intestini | 9148.5 | 0.211 |
| Bariatricus_massiliensis | 9342 | 0.262 |
| Hominisplanchenecus_faecis | 8927 | 0.629 |
| Coprococcus_phoceensis | 9506 | 0.607 |
| Coprococcus_comes ATCC 27758 | 9716 | 0.446 |
| Drancourtella_massiliensis | 9451.5 | 0.629 |
| Faecalimonas_umbilicata | 9284 | 0.914 |
| Mediterraneibacter_[Ruminococcus] gnavus ATCC 29149 | 8054 | 0.067 |
| Blautia_faecicola | 9504 | 0.074 |
| Blautia_brookingsii | 9279 | 0.787 |
| Oliverpabstia_intestinalis | 8549 | 0.157 |
| Blautia_hansenii DSM 20583 | 8898 | 0.380 |
| Blautia_argi | 9701 | 0.144 |
| Blautia_coccoides | 9245 | 0.956 |
| Blautia_producta ATCC 27340 = DSM 2950 | 9141 | 0.575 |
| Blautia_hominis | 9525 | 0.417 |
| Blautia_pseudococcoides | 9203 | 0.751 |
| Blautia_stercoris | 8731 | 0.223 |
| Blautia_schinkii | 9228 | 0.971 |
| Blautia_luti | 9397 | 0.787 |
| Blautia_obeum ATCC 29174 | 9874 | 0.293 |
| Blautia_intestinalis | 9680.5 | 0.432 |
| Blautia_provencensis | 9703 | 0.457 |
| Blautia_wexlerae DSM 19850 | 9394.5 | 0.806 |
| Blautia_luti DSM 14534 | 9824 | 0.360 |
| Blautia_faecis | 8744 | 0.335 |
| Blautia_phocaeensis | 9601.5 | 0.569 |
| Blautia_caecimuris | 8581 | 0.121 |
| Blautia_hydrogenotrophica | 8993 | 0.574 |
| Robinsoniella_peoriensis | 9203 | 0.751 |
| Fusicatenibacter_saccharivorans | 9418.5 | 0.778 |
| Bilifractor_porci | 9288 | 0.431 |
| Wansuia_hejianensis | 9373 | 0.563 |
| Murimonas_intestini | 9311 | 0.571 |
| Jingyaoa_shaoxingensis | 9228 | 0.989 |
| Marvinbryantia_formatexigens | 9148.5 | 0.211 |
| Lachnoclostridium_[Clostridium] symbiosum | 9042 | 0.670 |
| Clostridium_transplantifaecale | 9249 | 0.961 |
| Clostridium_fessum | 9481 | 0.448 |
| Lachnoclostridium_edouardi | 9337 | 0.876 |
| Hungatella_xylanolytica | 9417 | 0.524 |
| Lacrimispora_sphenoides | 9256.5 | 0.851 |
| Lacrimispora_amygdalina | 9380 | 0.821 |
| **Hungatella_hathewayi** | **10052** | **0.030** |
| Hungatella_effluvii | 9272 | 0.935 |
| Mordavella_massiliensis | 9417 | 0.269 |
| Enterocloster_bolteae | 9538 | 0.643 |
| Lacrimispora_saccharolytica | 9206 | 0.966 |
| Lachnoclostridium_pacaense | 10385 | 0.079 |
| Enterocloster_lavalensis | 8867 | 0.488 |
| Enterocloster_aldenensis | 9499 | 0.595 |
| Enterocloster_citroniae | 9193 | 0.934 |
| Enterocloster_clostridioformis | 9440.5 | 0.541 |
| Lachnoclostridium_urinimassiliense | 9226 | 0.983 |
| Lacrimispora_aerotolerans | 9006 | 0.678 |
| Clostridium_porci | 9268 | 0.880 |
| Diplocloster_modestus | 9558 | 0.050 |
| Diplocloster_agilis | 9599 | 0.114 |
| Ruminococcus_gauvreauii | 9342 | 0.262 |
| Roseburia_porci | 9288 | 0.431 |
| Eubacterium_oxidoreducens | 9766.5 | 0.327 |
| Eubacterium_ramulus ATCC 29099 | 9652 | 0.508 |
| Lactonifactor_longoviformis | 9149 | 0.816 |
| Roseburia_lenta | 8621 | 0.281 |
| [Eubacterium]_rectale ATCC 33656 | 9840 | 0.346 |
| Roseburia_faecis | 9450 | 0.739 |
| Roseburia_hominis A2-183 | 8659 | 0.358 |
| Roseburia_intestinalis L1-82 | 9214 | 0.975 |
| Roseburia_inulinivorans DSM 16841 | 10053.5 | 0.209 |

Note: Bold values indicate gut microbiota taxa with significant differences in relative abundance between good and poor sleepers (as shown in Figure 2).
